# Supplementary material for: Transmission, distribution and drug resistance-conferring mutations of extensively drug-resistant tuberculosis in the Western Cape Province, South Africa
Source: PubMed Central journal article supplement — Microb Genom. 2022 Apr 26;8(4):000815. doi: 10.1099/mgen.0.000815 (PMC9453078; doi:10.1099/mgen.0.000815), 2022-04-26

## Supplementary tables

**Table S1** Distribution of drug resistance conferring mutations in different genes included in the cluster analysis for INH, RIF, EMB, PZA, SLIDs and FQs among 461 XDR-TB patients diagnosed with XDR-TB in the Western Cape Province of South Africa, 2006 – 2017

| Drugs | Gene                               | Different mutations                                 | Isolates n (%) |
|-------|------------------------------------|-----------------------------------------------------|----------------|
| INH   | <i>inhA</i> promotor               | <i>fabG1_c.</i> -15C>T                              | 31 (6.7)       |
|       | <i>inhA</i> promotor + <i>ahpC</i> | <i>fabG1_c.</i> -15C>T, <i>ahpC_c.</i> -48G>A       | 1 (0.2)        |
|       | <i>katG</i> + <i>ahpC</i>          | <i>katG_p.</i> Ser315Thr, <i>ahpC_c.</i> -48G>A     | 13 (2.8)       |
|       | <i>inhA</i> promotor + <i>inhA</i> | <i>fabG1_c.</i> -15C>T, <i>inhA_p.</i> Ile194Thr    | 72 (15.6)      |
|       | <i>inhA</i> + <i>katG</i>          | <i>inhA_p.</i> Ser94Ala, <i>katG_p.</i> Ser315Thr   | 3 (0.7)        |
|       | <i>inhA</i> promotor + <i>katG</i> | <i>fabG1_c.</i> -15C>T, <i>katG_p.</i> Ser315Thr    | 143 (31.0)     |
|       |                                    | <i>fabG1_c.</i> -15C>T, <i>katG_p.</i> Thr394Ala    | 1 (0.2)        |
|       |                                    | <i>fabG1_c.</i> -17G>T, <i>katG_p.</i> Ser315Thr    | 153 (33.2)     |
|       |                                    | <i>fabG1_c.</i> -8T>A, <i>katG_p.</i> Ser315Thr     | 7 (0.4)        |
|       | <i>katG</i>                        | <i>katG_p.</i> Ser315Thr                            | 37 (8.0)       |
| RIF   | <i>rpoB</i>                        | <i>rpoB_p.</i> Asp435Gly, <i>rpoB_p.</i> Leu452Pro  | 5 (1.1)        |
|       |                                    | <i>rpoB_p.</i> Asp435Tyr                            | 4 (0.9)        |
|       |                                    | <i>rpoB_p.</i> Asp435Val                            | 154 (33.4)     |
|       |                                    | <i>rpoB_p.</i> Gln432Lys                            | 1 (0.2)        |
|       |                                    | <i>rpoB_p.</i> His445Asn                            | 1 (0.2)        |
|       |                                    | <i>rpoB_p.</i> His445Asp                            | 1 (0.2)        |
|       |                                    | <i>rpoB_p.</i> Ser450Leu                            | 286 (62.0)     |
|       |                                    | <i>rpoB_p.</i> Ser450Leu, <i>rpoB_p.</i> His445Arg  | 1 (0.2)        |
|       | <i>rpoB</i> + <i>rpoC</i>          | <i>rpoC_p.</i> Leu527Val, <i>rpoB_p.</i> Ser450Leu  | 4 (0.9)        |
|       |                                    | <i>rpoC_p.</i> Phe452Ser, <i>rpoB_p.</i> Ser450Leu  | 2 (0.4)        |
| EMB*  | <i>embA</i>                        | <i>embA_c.</i> -16C>G                               | 4 (0.9)        |
|       | <i>embB</i>                        | <i>embB_p.</i> Asp354Ala                            | 2 (0.4)        |
|       |                                    | <i>embB_p.</i> Gln497Arg                            | 5 (1.1)        |
|       |                                    | <i>embB_p.</i> Gln497Lys, <i>embB_p.</i> Met306Ile  | 3 (0.7)        |
|       |                                    | <i>embB_p.</i> Gly406Asp                            | 2 (0.4)        |
|       |                                    | <i>embB_p.</i> Gly406Ser                            | 2 (0.4)        |
|       |                                    | <i>embB_p.</i> Met306Ile                            | 304 (65.9)     |
|       |                                    | <i>embB_p.</i> Met306Ile, <i>embB_p.</i> Asp1024Asn | 1 (0.2)        |
|       | <i>embB_p.</i> Met306Val           | 127 (27.5)                                          |                |
|       | <i>embB</i> + <i>embA</i>          | <i>embB_p.</i> Met306Val, <i>embA_c.</i> -16C>T     | 2 (0.4)        |
| PZA** | <i>pncA</i>                        | <i>pncA_c.</i> 135_136insTG                         | 1 (0.2)        |
|       |                                    | <i>pncA_c.</i> 389_389del                           | 1 (0.2)        |
|       |                                    | <i>pncA_c.</i> 391_392insGG                         | 1 (0.2)        |
|       |                                    | <i>pncA_c.</i> 456_457insC                          | 5 (1.1)        |
|       |                                    | <i>pncA_c.</i> 459_466del                           | 3 (0.7)        |
|       |                                    | <i>pncA_c.</i> 517_518insG                          | 153 (33.2)     |
|       |                                    | <i>pncA_p.</i> Asp8Asn                              | 33 (7.2)       |
|       |                                    | <i>pncA_p.</i> Cys14Arg                             | 144 (31.2)     |
|       |                                    | <i>pncA_p.</i> Cys14Trp                             | 1 (0.2)        |
|       |                                    | <i>pncA_p.</i> Gln10Pro                             | 3 (0.7)        |
|       |                                    | <i>pncA_p.</i> Gly132Ala                            | 1 (0.2)        |

|                     |                           |                                                   |            |
|---------------------|---------------------------|---------------------------------------------------|------------|
|                     |                           | <i>pncA</i> _p.Met175Val                          | 1 (0.2)    |
|                     |                           | <i>pncA</i> _p.Phe13Leu                           | 1 (0.2)    |
|                     |                           | <i>pncA</i> _p.Ser164Pro                          | 6 (1.3)    |
|                     |                           | <i>pncA</i> _p.Thr135Pro                          | 6 (1.3)    |
|                     |                           | <i>pncA</i> _p.Thr142Met                          | 1 (0.2)    |
|                     |                           | <i>pncA</i> _p.Tyr103*                            | 10 (2.2)   |
|                     |                           | <i>pncA</i> _p.Val130Ala                          | 7 (1.5)    |
|                     |                           | <i>pncA</i> _p.Val139Gly                          | 1 (0.2)    |
|                     |                           | <i>pncA</i> _p.Val139Met                          | 13 (2.8)   |
| <b>SLIDs</b>        | <i>rrs</i>                | <i>rrs</i> _r.1401a>g                             | 448 (97.2) |
|                     |                           | <i>rrs</i> _r.1402c>t                             | 1 (0.2)    |
|                     | <i>eis</i>                | <i>eis</i> _c.-10G>A                              | 2 (0.4)    |
|                     |                           | <i>eis</i> _c.-10G>C                              | 4 (0.9)    |
|                     |                           | <i>eis</i> _c.-12C>T                              | 2 (0.4)    |
|                     |                           | <i>eis</i> _c.-14C>T                              | 1 (0.2)    |
|                     |                           | <i>eis</i> _c.-37G>T                              | 2 (0.4)    |
| <i>eis</i> _c.-8C>A | 1 (0.2)                   |                                                   |            |
| <b>FQs</b>          | <i>gyrA</i>               | <i>gyrA</i> _p.Ala90Val                           | 67 (14.5)  |
|                     |                           | <i>gyrA</i> _p.Asp89Asn                           | 1 (0.2)    |
|                     |                           | <i>gyrA</i> _p.Asp94Ala                           | 51 (11.1)  |
|                     |                           | <i>gyrA</i> _p.Asp94Ala, <i>gyrA</i> _p.Ala90Val  | 2 (0.4)    |
|                     |                           | <i>gyrA</i> _p.Asp94Asn                           | 55 (11.9)  |
|                     |                           | <i>gyrA</i> _p.Asp94Gly                           | 206 (44.7) |
|                     |                           | <i>gyrA</i> _p.Asp94His                           | 4 (0.9)    |
|                     |                           | <i>gyrA</i> _p.Asp94Tyr                           | 16 (3.5)   |
|                     |                           | <i>gyrA</i> _p.Gly88Cys                           | 15 (3.3)   |
|                     |                           | <i>gyrA</i> _p.Ser91Pro                           | 18 (3.9)   |
|                     |                           | <i>gyrA</i> _p.Ser91Pro, <i>gyrA</i> _p.Ala90Val  | 1 (0.2)    |
|                     |                           | <i>gyrA</i> _p.Ser91Pro, <i>gyrA</i> _p.Asp94Gly  | 1 (0.2)    |
|                     | <i>gyrB</i>               | <i>gyrB</i> _p.Arg446Cys                          | 6 (1.3)    |
|                     |                           | <i>gyrB</i> _p.Asn499Asp                          | 1 (0.2)    |
|                     |                           | <i>gyrB</i> _p.Asn499Lys                          | 1 (0.2)    |
|                     |                           | <i>gyrB</i> _p.Asp461Asn                          | 4 (0.9)    |
|                     |                           | <i>gyrB</i> _p.Asp461His                          | 3 (0.7)    |
|                     |                           | <i>gyrB</i> _p.Glu501Asp                          | 5 (1.1)    |
|                     | <i>gyrA</i> + <i>gyrB</i> | <i>gyrB</i> _p.Glu501Val                          | 1 (0.2)    |
|                     |                           | <i>gyrB</i> _p.Arg446Cys, <i>gyrA</i> _p.Ala90Val | 1 (0.2)    |
|                     |                           | <i>gyrB</i> _p.Asp461Asn, <i>gyrA</i> _p.Ala90Val | 2 (0.4)    |

<sup>a</sup> NA = not applicable, INH = isoniazid, RIF = rifampicin, EMB = ethambutol, PZA = pyrazinamide, SLIDs = second line injectable drugs, FQs = fluoroquinolones, \*isolates susceptible to EMB (n=9), \*\*isolates with no *pncA* mutations and susceptible to PZA (n=69)

*Table S2 All mutations observed in the samples included in the analyses*

| <b>SAMPLE</b> | <b>RIF</b>       | <b>INH</b>                          | <b>PZA</b>         | <b>EMB</b>       | <b>FQS</b>                          | <b>SLIDS</b>  |
|---------------|------------------|-------------------------------------|--------------------|------------------|-------------------------------------|---------------|
| <b>R20784</b> | rpoB_p.Asp435Val | fabG1_c.-17G>T,<br>katG_p.Ser315Thr | pncA_c.517_518insG | embB_p.Met306Ile | gyrA_p.Asp94Gly                     | rrs_r.1401a>g |
| <b>R24480</b> | rpoB_p.Ser450Leu | fabG1_c.-15C>T,<br>inhA_p.Ile194Thr | pncA_p.Thr135Pro   | embB_p.Met306Val | gyrA_p.Ala90Val                     | rrs_r.1401a>g |
| <b>R34488</b> | rpoB_p.Asp435Val | fabG1_c.-17G>T,<br>katG_p.Ser315Thr | pncA_c.517_518insG | embB_p.Met306Ile | gyrA_p.Asp94Asn                     | rrs_r.1401a>g |
| <b>R6709</b>  | rpoB_p.Asp435Val | fabG1_c.-17G>T,<br>katG_p.Ser315Thr | pncA_c.517_518insG | embB_p.Met306Ile | gyrA_p.Asp94Asn                     | rrs_r.1401a>g |
| <b>R36768</b> | rpoB_p.Asp435Val | fabG1_c.-17G>T,<br>katG_p.Ser315Thr | pncA_c.517_518insG | embB_p.Met306Ile | gyrA_p.Asp94Asn                     | rrs_r.1401a>g |
| <b>R38716</b> | rpoB_p.Ser450Leu | fabG1_c.-15C>T,<br>inhA_p.Ile194Thr | -                  | embB_p.Met306Val | gyrA_p.Asp94Ala,<br>gyrA_p.Ala90Val | rrs_r.1401a>g |
| <b>R35914</b> | rpoB_p.Ser450Leu | fabG1_c.-15C>T,<br>inhA_p.Ile194Thr | -                  | embB_p.Met306Val | gyrA_p.Asp94Ala                     | rrs_r.1401a>g |
| <b>R35861</b> | rpoB_p.Asp435Val | fabG1_c.-17G>T,<br>katG_p.Ser315Thr | pncA_c.517_518insG | embB_p.Met306Ile | gyrA_p.Asp94Gly                     | rrs_r.1401a>g |
| <b>R19366</b> | rpoB_p.Asp435Val | katG_p.Ser315Thr                    | pncA_p.Phe13Leu    | embB_p.Met306Ile | gyrA_p.Asp94Asn                     | rrs_r.1401a>g |
| <b>R15097</b> | rpoB_p.Ser450Leu | fabG1_c.-15C>T,<br>katG_p.Ser315Thr | pncA_p.Cys14Arg    | embB_p.Met306Ile | gyrA_p.Asp94Tyr                     | rrs_r.1401a>g |
| <b>R4274</b>  | rpoB_p.Ser450Leu | fabG1_c.-15C>T,<br>katG_p.Ser315Thr | pncA_p.Cys14Arg    | embB_p.Met306Ile | gyrA_p.Ala90Val                     | rrs_r.1401a>g |
| <b>R39526</b> | rpoB_p.Ser450Leu | ahpC_c.-48G>A,<br>katG_p.Ser315Thr  | pncA_p.Val139Met   | embB_p.Met306Val | gyrA_p.Gly88Cys                     | rrs_r.1401a>g |
| <b>R11121</b> | rpoB_p.Ser450Leu | fabG1_c.-15C>T,<br>katG_p.Ser315Thr | pncA_p.Cys14Arg    | embB_p.Met306Ile | gyrA_p.Asp94Tyr                     | rrs_r.1401a>g |
| <b>R13403</b> | rpoB_p.Ser450Leu | fabG1_c.-15C>T,<br>inhA_p.Ile194Thr | -                  | embB_p.Met306Val | gyrA_p.Asp94Ala                     | rrs_r.1401a>g |
| <b>R13123</b> | rpoB_p.Ser450Leu | fabG1_c.-15C>T                      | pncA_p.Cys14Trp    | embB_p.Met306Val | gyrA_p.Asp94Gly                     | rrs_r.1401a>g |
| <b>R23865</b> | rpoB_p.Ser450Leu | fabG1_c.-15C>T,<br>katG_p.Ser315Thr | pncA_p.Cys14Arg    | embB_p.Met306Ile | gyrA_p.Asp94Gly                     | rrs_r.1401a>g |
| <b>R27545</b> | rpoB_p.Ser450Leu | fabG1_c.-15C>T,<br>katG_p.Ser315Thr | pncA_p.Cys14Arg    | embB_p.Met306Ile | gyrA_p.Asp94Gly                     | rrs_r.1401a>g |
| <b>R29439</b> | rpoB_p.Asp435Val | fabG1_c.-17G>T,<br>katG_p.Ser315Thr | pncA_c.517_518insG | embB_p.Met306Ile | gyrA_p.Ala90Val                     | rrs_r.1401a>g |

|               |                                       |                                      |                    |                  |                 |               |
|---------------|---------------------------------------|--------------------------------------|--------------------|------------------|-----------------|---------------|
| <b>R11654</b> | rpoB_p.Ser450Leu                      | katG_p.Ser315Thr,<br>inhA_p.Ser94Ala | pncA_p.Gln10Pro    | embB_p.Gln497Arg | gyrA_p.Asp94Tyr | -             |
| <b>R32587</b> | rpoB_p.Ser450Leu                      | fabG1_c.-15C>T,<br>katG_p.Ser315Thr  | pncA_p.Cys14Arg    | embB_p.Met306Ile | gyrA_p.Asp94Gly | rrs_r.1401a>g |
| <b>R21471</b> | rpoB_p.Ser450Leu                      | fabG1_c.-15C>T,<br>inhA_p.Ile194Thr  | -                  | embB_p.Met306Val | gyrA_p.Asp94Ala | rrs_r.1401a>g |
| <b>R20376</b> | rpoB_p.Ser450Leu                      | fabG1_c.-15C>T,<br>katG_p.Ser315Thr  | pncA_p.Cys14Arg    | embB_p.Met306Ile | gyrA_p.Asp94Gly | rrs_r.1401a>g |
| <b>R33930</b> | rpoB_p.Ser450Leu                      | fabG1_c.-15C>T                       | -                  | -                | gyrA_p.Ala90Val | rrs_r.1401a>g |
| <b>R37017</b> | rpoB_p.Ser450Leu                      | fabG1_c.-15C>T,<br>katG_p.Ser315Thr  | pncA_p.Cys14Arg    | embB_p.Met306Ile | gyrA_p.Asp94Gly | rrs_r.1401a>g |
| <b>R31116</b> | rpoB_p.Asp435Val                      | fabG1_c.-17G>T,<br>katG_p.Ser315Thr  | pncA_c.517_518insG | embB_p.Met306Ile | gyrA_p.Ser91Pro | rrs_r.1401a>g |
| <b>R10867</b> | rpoB_p.Asp435Val                      | fabG1_c.-17G>T,<br>katG_p.Ser315Thr  | pncA_c.517_518insG | embB_p.Met306Ile | gyrA_p.Asp94Gly | rrs_r.1401a>g |
| <b>R24220</b> | rpoB_p.Asp435Val                      | fabG1_c.-17G>T,<br>katG_p.Ser315Thr  | pncA_c.517_518insG | embB_p.Met306Ile | gyrA_p.Asp94Asn | rrs_r.1401a>g |
| <b>R27133</b> | rpoB_p.Asp435Val                      | fabG1_c.-17G>T,<br>katG_p.Ser315Thr  | pncA_c.517_518insG | embB_p.Met306Ile | gyrA_p.Ser91Pro | rrs_r.1401a>g |
| <b>X116</b>   | rpoB_p.Asp435Val                      | fabG1_c.-17G>T,<br>katG_p.Ser315Thr  | pncA_c.517_518insG | embB_p.Met306Ile | gyrA_p.Ala90Val | rrs_r.1401a>g |
| <b>R19367</b> | rpoB_p.Ser450Leu,<br>rpoB_p.Thr400Ala | fabG1_c.-15C>T                       | -                  | embB_p.Gly406Ser | gyrA_p.Asp94Ala | rrs_r.1401a>g |
| <b>R27188</b> | rpoB_p.Asp435Val                      | fabG1_c.-17G>T,<br>katG_p.Ser315Thr  | pncA_c.517_518insG | embB_p.Met306Ile | gyrA_p.Asp94Gly | rrs_r.1401a>g |
| <b>R4218</b>  | rpoB_p.Ser450Leu                      | fabG1_c.-15C>T,<br>katG_p.Ser315Thr  | pncA_p.Cys14Arg    | embB_p.Met306Ile | gyrA_p.Asp94Gly | rrs_r.1401a>g |
| <b>R22010</b> | rpoB_p.Ser450Leu                      | fabG1_c.-15C>T,<br>katG_p.Ser315Thr  | pncA_p.Cys14Arg    | embB_p.Met306Ile | gyrA_p.Asp94Gly | rrs_r.1401a>g |
| <b>R19517</b> | rpoB_p.Ser450Leu                      | fabG1_c.-15C>T,<br>inhA_p.Ile194Thr  | pncA_p.Val130Ala   | embB_p.Met306Val | gyrA_p.Asp94Gly | rrs_r.1401a>g |
| <b>R27001</b> | rpoB_p.Ser450Leu                      | fabG1_c.-15C>T,<br>inhA_p.Ile194Thr  | -                  | embB_p.Met306Val | gyrA_p.Asp94Gly | rrs_r.1401a>g |
| <b>R39203</b> | rpoB_p.Ser450Leu                      | fabG1_c.-15C>T,<br>katG_p.Ser315Thr  | pncA_p.Cys14Arg    | embB_p.Met306Ile | gyrA_p.Asp94Gly | rrs_r.1401a>g |
| <b>R13723</b> | rpoB_p.Asp435Val                      | fabG1_c.-17G>T,<br>katG_p.Ser315Thr  | pncA_c.517_518insG | embB_p.Met306Ile | gyrA_p.Ala90Val | rrs_r.1401a>g |
| <b>R17660</b> | rpoB_p.Ser450Leu                      | fabG1_c.-15C>T,<br>katG_p.Ser315Thr  | pncA_p.Cys14Arg    | embB_p.Met306Ile | gyrA_p.Asp94Gly | rrs_r.1401a>g |

|               |                  |                                     |                     |                  |                  |               |
|---------------|------------------|-------------------------------------|---------------------|------------------|------------------|---------------|
| <b>R21670</b> | rpoB_p.Asp435Val | fabG1_c.-17G>T,<br>katG_p.Ser315Thr | pncA_c.517_518insG  | embB_p.Met306Ile | gyrA_p.Asp94Gly  | rrs_r.1401a>g |
| <b>R14894</b> | rpoB_p.Ser450Leu | fabG1_c.-15C>T,<br>katG_p.Ser315Thr | pncA_p.Cys14Arg     | embB_p.Met306Ile | gyrA_p.Asp94Gly  | rrs_r.1401a>g |
| <b>R18094</b> | rpoB_p.Asp435Val | fabG1_c.-17G>T,<br>katG_p.Ser315Thr | pncA_c.517_518insG  | embB_p.Met306Ile | gyrA_p.Asp94Gly  | rrs_r.1401a>g |
| <b>R29343</b> | rpoB_p.Ser450Leu | katG_p.Ser315Thr                    | pncA_c.391_392insGG | embB_p.Met306Ile | gyrA_p.Ala90Val  | rrs_r.1401a>g |
| <b>R10435</b> | rpoB_p.Ser450Leu | fabG1_c.-15C>T,<br>inhA_p.Ile194Thr | pncA_p.Asp8Asn      | embB_p.Met306Val | gyrA_p.Asp94Gly  | rrs_r.1401a>g |
| <b>R33907</b> | rpoB_p.Asp435Val | fabG1_c.-17G>T,<br>katG_p.Ser315Thr | pncA_c.517_518insG  | embB_p.Met306Ile | gyrA_p.Ala90Val  | rrs_r.1401a>g |
| <b>R8695</b>  | rpoB_p.Ser450Leu | ahpC_c.-48G>A,<br>katG_p.Ser315Thr  | pncA_p.Val139Met    | embB_p.Met306Val | gyrA_p.Asp94Gly  | -             |
| <b>R16642</b> | rpoB_p.Ser450Leu | fabG1_c.-15C>T,<br>inhA_p.Ile194Thr | pncA_p.Thr135Pro    | embB_p.Met306Val | gyrA_p.Ala90Val  | rrs_r.1401a>g |
| <b>X167</b>   | rpoB_p.Ser450Leu | fabG1_c.-15C>T,<br>inhA_p.Ile194Thr | pncA_p.Ser164Pro    | embB_p.Met306Val | gyrA_p.Ala90Val  | rrs_r.1401a>g |
| <b>R20666</b> | rpoB_p.Ser450Leu | fabG1_c.-15C>T,<br>katG_p.Ser315Thr | pncA_p.Cys14Arg     | embB_p.Met306Ile | gyrB_p.Asn499Lys | rrs_r.1401a>g |
| <b>R4250</b>  | rpoB_p.Ser450Leu | fabG1_c.-15C>T,<br>katG_p.Ser315Thr | pncA_p.Cys14Arg     | embB_p.Met306Ile | gyrA_p.Asp94Gly  | rrs_r.1401a>g |
| <b>R18476</b> | rpoB_p.Ser450Leu | fabG1_c.-15C>T,<br>katG_p.Ser315Thr | pncA_p.Cys14Arg     | embB_p.Met306Ile | gyrA_p.Asp94Gly  | rrs_r.1401a>g |
| <b>R20954</b> | rpoB_p.Asp435Tyr | katG_p.Ser315Thr                    | -                   | embA_c.-16C>G    | gyrA_p.Asp94Gly  | rrs_r.1401a>g |
| <b>R10912</b> | rpoB_p.Ser450Leu | fabG1_c.-15C>T,<br>katG_p.Ser315Thr | pncA_p.Cys14Arg     | embB_p.Met306Ile | gyrA_p.Asp94Gly  | rrs_r.1401a>g |
| <b>R9908</b>  | rpoB_p.Ser450Leu | fabG1_c.-15C>T,<br>inhA_p.Ile194Thr | -                   | embB_p.Met306Val | gyrA_p.Asp94Ala  | rrs_r.1401a>g |
| <b>R15629</b> | rpoB_p.Asp435Val | fabG1_c.-17G>T,<br>katG_p.Ser315Thr | pncA_c.517_518insG  | embB_p.Met306Ile | gyrA_p.Asp94Asn  | rrs_r.1401a>g |
| <b>R27153</b> | rpoB_p.Ser450Leu | fabG1_c.-15C>T,<br>katG_p.Ser315Thr | pncA_p.Cys14Arg     | embB_p.Met306Ile | gyrA_p.Asp94Gly  | rrs_r.1401a>g |
| <b>R24194</b> | rpoB_p.Asp435Val | fabG1_c.-17G>T,<br>katG_p.Ser315Thr | pncA_c.517_518insG  | embB_p.Met306Ile | gyrA_p.Ala90Val  | rrs_r.1401a>g |
| <b>R19148</b> | rpoB_p.Ser450Leu | fabG1_c.-15C>T,<br>katG_p.Ser315Thr | pncA_p.Cys14Arg     | embB_p.Met306Ile | gyrA_p.Asp94Gly  | rrs_r.1401a>g |
| <b>R6265</b>  | rpoB_p.Ser450Leu | fabG1_c.-15C>T,<br>inhA_p.Ile194Thr | -                   | embB_p.Met306Val | gyrA_p.Asp94Ala  | rrs_r.1401a>g |
| <b>R34500</b> | rpoB_p.Ser450Leu | fabG1_c.-15C>T,<br>katG_p.Ser315Thr | pncA_p.Cys14Arg     | embB_p.Met306Ile | gyrA_p.Asp94Gly  | rrs_r.1401a>g |

|               |                                       |                                      |                    |                  |                  |               |
|---------------|---------------------------------------|--------------------------------------|--------------------|------------------|------------------|---------------|
| <b>R9762</b>  | rpoB_p.Ser450Leu,<br>rpoB_p.Thr400Ala | fabG1_c.-15C>T                       | -                  | embB_p.Gly406Ser | gyrA_p.Asp94Ala  | rrs_r.1401a>g |
| <b>R10552</b> | rpoB_p.Ser450Leu                      | katG_p.Ser315Thr,<br>inhA_p.Ser94Ala | pncA_p.Gln10Pro    | embB_p.Gln497Arg | gyrA_p.Asp94Tyr  | -             |
| <b>R21313</b> | rpoB_p.Ser450Leu                      | fabG1_c.-15C>T,<br>katG_p.Thr394Ala  | pncA_p.Tyr103*     | embB_p.Met306Ile | gyrA_p.Ala90Val  | rrs_r.1401a>g |
| <b>R27420</b> | rpoB_p.Asp435Val                      | fabG1_c.-17G>T,<br>katG_p.Ser315Thr  | pncA_c.517_518insG | embB_p.Met306Ile | gyrA_p.Asp94Gly  | rrs_r.1401a>g |
| <b>R4853</b>  | rpoB_p.Ser450Leu                      | fabG1_c.-15C>T,<br>katG_p.Ser315Thr  | pncA_p.Cys14Arg    | embB_p.Met306Ile | gyrA_p.Asp94Gly  | rrs_r.1401a>g |
| <b>R13060</b> | rpoB_p.Ser450Leu                      | fabG1_c.-15C>T,<br>katG_p.Ser315Thr  | pncA_p.Cys14Arg    | embB_p.Met306Ile | gyrA_p.Asp94Gly  | rrs_r.1401a>g |
| <b>R6297</b>  | rpoB_p.Asp435Val                      | fabG1_c.-17G>T,<br>katG_p.Ser315Thr  | pncA_c.517_518insG | embB_p.Met306Ile | gyrB_p.Asp461Asn | -             |
| <b>R31647</b> | rpoB_p.Asp435Val                      | fabG1_c.-17G>T,<br>katG_p.Ser315Thr  | pncA_c.517_518insG | embB_p.Met306Ile | gyrA_p.Ala90Val  | rrs_r.1401a>g |
| <b>R39270</b> | rpoB_p.Ser450Leu                      | fabG1_c.-15C>T,<br>inhA_p.Ile194Thr  | pncA_p.Asp8Asn     | embB_p.Met306Val | gyrA_p.Ser91Pro  | rrs_r.1401a>g |
| <b>R5235</b>  | rpoB_p.Ser450Leu                      | fabG1_c.-15C>T                       | -                  | embB_p.Met306Ile | gyrA_p.Ala90Val  | rrs_r.1401a>g |
| <b>R28124</b> | rpoB_p.Ser450Leu                      | fabG1_c.-15C>T,<br>katG_p.Ser315Thr  | pncA_p.Cys14Arg    | embB_p.Met306Ile | gyrA_p.Asp94Gly  | rrs_r.1401a>g |
| <b>R26837</b> | rpoB_p.Asp435Val                      | fabG1_c.-17G>T,<br>katG_p.Ser315Thr  | pncA_c.517_518insG | embB_p.Met306Ile | gyrA_p.Asp94Gly  | rrs_r.1401a>g |
| <b>R35320</b> | rpoB_p.Asp435Tyr                      | katG_p.Ser315Thr                     | -                  | embA_c.-16C>G    | gyrA_p.Asp94Gly  | rrs_r.1401a>g |
| <b>R32251</b> | rpoB_p.Ser450Leu                      | fabG1_c.-15C>T,<br>katG_p.Ser315Thr  | pncA_p.Cys14Arg    | embB_p.Met306Ile | gyrA_p.Asp94Gly  | rrs_r.1401a>g |
| <b>R30006</b> | rpoB_p.Ser450Leu                      | fabG1_c.-15C>T,<br>inhA_p.Ile194Thr  | -                  | embB_p.Met306Val | gyrA_p.Asp94Ala  | rrs_r.1401a>g |
| <b>R5908</b>  | rpoB_p.Ser450Leu                      | fabG1_c.-15C>T,<br>katG_p.Ser315Thr  | pncA_p.Cys14Arg    | embB_p.Met306Ile | gyrA_p.Asp94Gly  | rrs_r.1401a>g |
| <b>R26993</b> | rpoB_p.Ser450Leu                      | fabG1_c.-15C>T,<br>katG_p.Ser315Thr  | pncA_p.Cys14Arg    | embB_p.Met306Ile | gyrA_p.Ala90Val  | rrs_r.1401a>g |
| <b>R23187</b> | rpoB_p.Ser450Leu                      | fabG1_c.-15C>T,<br>katG_p.Ser315Thr  | pncA_p.Cys14Arg    | embB_p.Met306Ile | gyrA_p.Asp94His  | rrs_r.1401a>g |
| <b>R27711</b> | rpoB_p.Ser450Leu                      | fabG1_c.-15C>T,<br>katG_p.Ser315Thr  | pncA_p.Cys14Arg    | embB_p.Met306Ile | gyrA_p.Asp94Gly  | rrs_r.1401a>g |
| <b>R19712</b> | rpoB_p.Asp435Val                      | fabG1_c.-17G>T,<br>katG_p.Ser315Thr  | pncA_c.517_518insG | embB_p.Met306Ile | gyrA_p.Asp94Asn  | rrs_r.1401a>g |
| <b>R11405</b> | rpoB_p.Asp435Val                      | fabG1_c.-17G>T,<br>katG_p.Ser315Thr  | pncA_c.517_518insG | embB_p.Met306Ile | gyrA_p.Asp94Gly  | rrs_r.1401a>g |

|               |                                       |                                     |                    |                  |                 |               |
|---------------|---------------------------------------|-------------------------------------|--------------------|------------------|-----------------|---------------|
| <b>R9964</b>  | rpoB_p.Asp435Val                      | fabG1_c.-17G>T,<br>katG_p.Ser315Thr | pncA_c.517_518insG | embB_p.Met306Ile | gyrA_p.Asp94Gly | rrs_r.1401a>g |
| <b>R29546</b> | rpoB_p.Asp435Val                      | fabG1_c.-17G>T,<br>katG_p.Ser315Thr | pncA_c.517_518insG | embB_p.Met306Ile | gyrA_p.Ser91Pro | rrs_r.1401a>g |
| <b>R11581</b> | rpoB_p.Ser450Leu                      | fabG1_c.-15C>T,<br>katG_p.Ser315Thr | pncA_p.Cys14Arg    | embB_p.Met306Ile | gyrA_p.Asp94Gly | rrs_r.1401a>g |
| <b>R16785</b> | rpoB_p.Asp435Val                      | fabG1_c.-17G>T,<br>katG_p.Ser315Thr | pncA_c.517_518insG | embB_p.Met306Ile | gyrA_p.Asp94His | rrs_r.1401a>g |
| <b>R4558</b>  | rpoB_p.Ser450Leu                      | fabG1_c.-15C>T,<br>katG_p.Ser315Thr | pncA_p.Cys14Arg    | embB_p.Met306Ile | gyrA_p.Asp94Asn | rrs_r.1401a>g |
| <b>R14770</b> | rpoB_p.Ser450Leu                      | fabG1_c.-15C>T,<br>inhA_p.Ile194Thr | -                  | embB_p.Met306Val | gyrA_p.Asp94Ala | rrs_r.1401a>g |
| <b>R17181</b> | rpoB_p.Asp435Val                      | fabG1_c.-17G>T,<br>katG_p.Ser315Thr | pncA_c.517_518insG | embB_p.Met306Ile | gyrA_p.Asp94Gly | rrs_r.1401a>g |
| <b>R5581</b>  | rpoB_p.Ser450Leu                      | fabG1_c.-15C>T,<br>katG_p.Ser315Thr | -                  | embB_p.Gln497Arg | gyrA_p.Ala90Val | rrs_r.1401a>g |
| <b>R36647</b> | rpoB_p.Ser450Leu                      | fabG1_c.-15C>T                      | pncA_p.Tyr103*     | embB_p.Met306Val | gyrA_p.Asp94Gly | -             |
| <b>R10318</b> | rpoB_p.Ser450Leu                      | fabG1_c.-15C>T,<br>inhA_p.Ile194Thr | -                  | embB_p.Met306Val | gyrA_p.Asp94Ala | rrs_r.1401a>g |
| <b>R11448</b> | rpoB_p.Asp435Val                      | fabG1_c.-17G>T,<br>katG_p.Ser315Thr | pncA_c.517_518insG | embB_p.Met306Ile | gyrA_p.Ala90Val | rrs_r.1401a>g |
| <b>R20710</b> | rpoB_p.Ser450Leu                      | fabG1_c.-15C>T,<br>katG_p.Ser315Thr | pncA_p.Cys14Arg    | embB_p.Met306Ile | gyrA_p.Asp94Gly | rrs_r.1401a>g |
| <b>R34486</b> | rpoB_p.Asp435Val                      | fabG1_c.-17G>T,<br>katG_p.Ser315Thr | pncA_c.517_518insG | embB_p.Met306Ile | gyrA_p.Asp94Ala | rrs_r.1401a>g |
| <b>R33481</b> | rpoB_p.Ser450Leu,<br>rpoC_p.Leu527Val | fabG1_c.-15C>T,<br>inhA_p.Ile194Thr | -                  | embB_p.Met306Val | gyrA_p.Ala90Val | rrs_r.1401a>g |
| <b>R27383</b> | rpoB_p.Ser450Leu                      | fabG1_c.-15C>T,<br>inhA_p.Ile194Thr | -                  | embB_p.Met306Val | gyrA_p.Asp94Ala | rrs_r.1401a>g |
| <b>R36909</b> | rpoB_p.Ser450Leu                      | katG_p.Ser315Thr                    | pncA_p.Asp8Asn     | embB_p.Met306Val | gyrA_p.Asp94Gly | rrs_r.1401a>g |
| <b>R13188</b> | rpoB_p.Ser450Leu                      | fabG1_c.-15C>T,<br>inhA_p.Ile194Thr | -                  | embB_p.Met306Val | gyrA_p.Asp94Ala | rrs_r.1401a>g |
| <b>R30371</b> | rpoB_p.Asp435Val                      | fabG1_c.-17G>T,<br>katG_p.Ser315Thr | pncA_c.517_518insG | embB_p.Met306Ile | gyrA_p.Ala90Val | rrs_r.1401a>g |
| <b>R19868</b> | rpoB_p.Asp435Val                      | fabG1_c.-17G>T,<br>katG_p.Ser315Thr | pncA_c.517_518insG | embB_p.Met306Ile | gyrA_p.Asp94Gly | rrs_r.1401a>g |
| <b>R23831</b> | rpoB_p.Ser450Leu                      | fabG1_c.-15C>T,<br>katG_p.Ser315Thr | pncA_p.Cys14Arg    | embB_p.Met306Ile | gyrA_p.Asp94Gly | rrs_r.1401a>g |
| <b>R22020</b> | rpoB_p.Asp435Val                      | fabG1_c.-17G>T,<br>katG_p.Ser315Thr | pncA_c.517_518insG | embB_p.Met306Ile | gyrA_p.Ala90Val | rrs_r.1401a>g |

|               |                  |                                     |                    |                  |                  |               |
|---------------|------------------|-------------------------------------|--------------------|------------------|------------------|---------------|
| <b>R15633</b> | rpoB_p.Ser450Leu | fabG1_c.-15C>T,<br>inhA_p.Ile194Thr | -                  | embB_p.Met306Val | gyrA_p.Asp94Ala  | rrs_r.1401a>g |
| <b>R11139</b> | rpoB_p.Ser450Leu | fabG1_c.-15C>T                      | pncA_c.459_466del  | embB_p.Met306Val | gyrA_p.Ser91Pro  | rrs_r.1401a>g |
| <b>X4</b>     | rpoB_p.Asp435Val | fabG1_c.-17G>T,<br>katG_p.Ser315Thr | pncA_c.517_518insG | embB_p.Met306Ile | gyrA_p.Ser91Pro  | rrs_r.1401a>g |
| <b>R9946</b>  | rpoB_p.Ser450Leu | fabG1_c.-15C>T,<br>katG_p.Ser315Thr | pncA_p.Cys14Arg    | embB_p.Met306Ile | gyrB_p.Asp461Asn | rrs_r.1401a>g |
| <b>R10873</b> | rpoB_p.Asp435Val | fabG1_c.-17G>T,<br>katG_p.Ser315Thr | pncA_c.517_518insG | embB_p.Met306Ile | gyrA_p.Asp94Asn  | rrs_r.1401a>g |
| <b>R24620</b> | rpoB_p.Ser450Leu | fabG1_c.-15C>T                      | pncA_c.459_466del  | embB_p.Met306Val | gyrA_p.Asp94Gly  | rrs_r.1401a>g |
| <b>R10921</b> | rpoB_p.Asp435Val | fabG1_c.-17G>T,<br>katG_p.Ser315Thr | pncA_c.517_518insG | embB_p.Met306Ile | gyrA_p.Asp94Asn  | rrs_r.1401a>g |
| <b>R4888</b>  | rpoB_p.Ser450Leu | fabG1_c.-15C>T,<br>katG_p.Ser315Thr | pncA_p.Cys14Arg    | embB_p.Met306Ile | gyrA_p.Asp94Gly  | rrs_r.1401a>g |
| <b>R35632</b> | rpoB_p.Ser450Leu | fabG1_c.-15C>T,<br>inhA_p.Ile194Thr | -                  | embB_p.Met306Val | gyrA_p.Asp94Ala  | rrs_r.1401a>g |
| <b>R30452</b> | rpoB_p.Ser450Leu | katG_p.Ser315Thr                    | pncA_p.Asp8Asn     | embB_p.Met306Val | gyrA_p.Asp94Gly  | rrs_r.1401a>g |
| <b>R21302</b> | rpoB_p.Ser450Leu | katG_p.Ser315Thr                    | pncA_p.Asp8Asn     | embB_p.Met306Val | gyrA_p.Asp94Gly  | rrs_r.1401a>g |
| <b>R39835</b> | rpoB_p.Ser450Leu | katG_p.Ser315Thr                    | pncA_p.Asp8Asn     | embB_p.Met306Val | gyrA_p.Asp94Gly  | rrs_r.1401a>g |
| <b>R29662</b> | rpoB_p.Ser450Leu | fabG1_c.-15C>T                      | -                  | embB_p.Met306Val | gyrB_p.Arg446Cys | rrs_r.1401a>g |
| <b>R37464</b> | rpoB_p.Ser450Leu | fabG1_c.-15C>T,<br>katG_p.Ser315Thr | pncA_p.Cys14Arg    | embB_p.Met306Ile | gyrA_p.Asp94Gly  | rrs_r.1401a>g |
| <b>R27664</b> | rpoB_p.Ser450Leu | fabG1_c.-15C>T,<br>katG_p.Ser315Thr | pncA_p.Cys14Arg    | embB_p.Met306Ile | gyrA_p.Asp94Gly  | rrs_r.1401a>g |
| <b>R31345</b> | rpoB_p.Ser450Leu | ahpC_c.-48G>A,<br>katG_p.Ser315Thr  | pncA_p.Val139Met   | embB_p.Met306Val | gyrA_p.Asp94Gly  | rrs_r.1401a>g |
| <b>R24675</b> | rpoB_p.Asp435Val | fabG1_c.-17G>T,<br>katG_p.Ser315Thr | pncA_c.517_518insG | embB_p.Met306Ile | gyrA_p.Ala90Val  | rrs_r.1401a>g |
| <b>R33323</b> | rpoB_p.Ser450Leu | fabG1_c.-15C>T                      | -                  | -                | gyrA_p.Ala90Val  | rrs_r.1401a>g |
| <b>R3715</b>  | rpoB_p.Ser450Leu | katG_p.Ser315Thr                    | pncA_p.Cys14Arg    | embB_p.Met306Ile | gyrA_p.Asp94Asn  | rrs_r.1401a>g |
| <b>R39416</b> | rpoB_p.Asp435Val | fabG1_c.-17G>T,<br>katG_p.Ser315Thr | pncA_c.517_518insG | embB_p.Met306Ile | gyrA_p.Asp94Gly  | rrs_r.1401a>g |
| <b>R18531</b> | rpoB_p.Asp435Val | fabG1_c.-17G>T,<br>katG_p.Ser315Thr | pncA_c.517_518insG | embB_p.Met306Ile | gyrA_p.Asp94Asn  | rrs_r.1401a>g |
| <b>R3696</b>  | rpoB_p.Asp435Val | fabG1_c.-17G>T,<br>katG_p.Ser315Thr | pncA_c.517_518insG | embB_p.Met306Ile | gyrA_p.Asp94Asn  | rrs_r.1401a>g |



|               |                                       |                                     |                    |                  |                                      |               |
|---------------|---------------------------------------|-------------------------------------|--------------------|------------------|--------------------------------------|---------------|
| <b>R12966</b> | rpoB_p.Ser450Leu                      | fabG1_c.-15C>T                      | -                  | embB_p.Met306Val | gyrB_p.Arg446Cys                     | rrs_r.1401a>g |
| <b>R17871</b> | rpoB_p.Asp435Val                      | fabG1_c.-17G>T,<br>katG_p.Ser315Thr | pncA_c.517_518insG | embB_p.Met306Ile | gyrA_p.Asp94Asn                      | rrs_r.1401a>g |
| <b>R27129</b> | rpoB_p.Asp435Val                      | fabG1_c.-17G>T,<br>katG_p.Ser315Thr | pncA_c.517_518insG | embB_p.Met306Ile | gyrA_p.Asp94Gly                      | rrs_r.1401a>g |
| <b>R17207</b> | rpoB_p.Ser450Leu                      | fabG1_c.-15C>T,<br>inhA_p.Ile194Thr | -                  | embB_p.Met306Val | gyrA_p.Asp94Ala                      | rrs_r.1401a>g |
| <b>R24417</b> | rpoB_p.Ser450Leu                      | katG_p.Ser315Thr                    | pncA_p.Asp8Asn     | embB_p.Met306Val | gyrA_p.Asp94Gly                      | rrs_r.1401a>g |
| <b>R26807</b> | rpoB_p.Asp435Val                      | fabG1_c.-17G>T,<br>katG_p.Ser315Thr | pncA_c.517_518insG | embB_p.Met306Ile | gyrA_p.Asp94Asn                      | rrs_r.1401a>g |
| <b>R39422</b> | rpoB_p.Ser450Leu                      | fabG1_c.-15C>T,<br>katG_p.Ser315Thr | pncA_p.Cys14Arg    | embB_p.Met306Ile | gyrB_p.Asp461Asn,<br>gyrA_p.Ala90Val | rrs_r.1401a>g |
| <b>R9127</b>  | rpoB_p.Ser450Leu                      | fabG1_c.-15C>T,<br>katG_p.Ser315Thr | pncA_p.Cys14Arg    | embB_p.Met306Ile | gyrA_p.Asp94Gly                      | rrs_r.1401a>g |
| <b>R18066</b> | rpoB_p.Ser450Leu                      | fabG1_c.-15C>T,<br>katG_p.Ser315Thr | pncA_p.Cys14Arg    | embB_p.Met306Ile | gyrA_p.Asp94Tyr                      | rrs_r.1401a>g |
| <b>R3896</b>  | rpoB_p.Ser450Leu                      | fabG1_c.-15C>T,<br>katG_p.Ser315Thr | pncA_p.Cys14Arg    | embB_p.Met306Ile | gyrA_p.Asp94Gly                      | rrs_r.1401a>g |
| <b>X130</b>   | rpoB_p.Asp435Val                      | fabG1_c.-17G>T,<br>katG_p.Ser315Thr | pncA_c.517_518insG | embB_p.Met306Ile | gyrA_p.Asp94Asn                      | rrs_r.1401a>g |
| <b>R36850</b> | rpoB_p.Asp435Gly,<br>rpoB_p.Leu452Pro | fabG1_c.-8T>A,<br>katG_p.Ser315Thr  | pncA_c.456_457insC | embB_p.Met306Val | gyrA_p.Ala90Val                      | rrs_r.1401a>g |
| <b>R19234</b> | rpoB_p.Ser450Leu                      | katG_p.Ser315Thr                    | -                  | embB_p.Met306Ile | gyrA_p.Asp94Gly                      | rrs_r.1401a>g |
| <b>R13602</b> | rpoB_p.Ser450Leu                      | fabG1_c.-15C>T,<br>inhA_p.Ile194Thr | pncA_p.Asp8Asn     | embB_p.Met306Val | gyrA_p.Ser91Pro                      | rrs_r.1401a>g |
| <b>R9882</b>  | rpoB_p.Asp435Val                      | fabG1_c.-17G>T,<br>katG_p.Ser315Thr | pncA_c.517_518insG | embB_p.Met306Ile | gyrA_p.Gly88Cys                      | rrs_r.1401a>g |
| <b>R8073</b>  | rpoB_p.Asp435Val                      | fabG1_c.-17G>T,<br>katG_p.Ser315Thr | pncA_c.517_518insG | embB_p.Met306Ile | gyrA_p.Asp94Asn                      | rrs_r.1401a>g |
| <b>R17400</b> | rpoB_p.Ser450Leu                      | fabG1_c.-15C>T,<br>inhA_p.Ile194Thr | -                  | embB_p.Met306Val | gyrA_p.Asp94Ala                      | rrs_r.1401a>g |
| <b>R18522</b> | rpoB_p.Ser450Leu                      | fabG1_c.-15C>T,<br>inhA_p.Ile194Thr | -                  | embB_p.Met306Val | gyrA_p.Asp94Ala                      | rrs_r.1401a>g |
| <b>R34305</b> | rpoB_p.Ser450Leu                      | ahpC_c.-48G>A,<br>katG_p.Ser315Thr  | pncA_p.Val139Met   | embB_p.Met306Val | gyrB_p.Asp461His                     | rrs_r.1401a>g |
| <b>R31322</b> | rpoB_p.Asp435Val                      | fabG1_c.-17G>T,<br>katG_p.Ser315Thr | pncA_c.517_518insG | embB_p.Met306Ile | gyrA_p.Asp94Asn                      | rrs_r.1401a>g |
| <b>R28413</b> | rpoB_p.Ser450Leu                      | katG_p.Ser315Thr                    | pncA_p.Asp8Asn     | embB_p.Met306Val | gyrA_p.Asp94Gly                      | rrs_r.1401a>g |

|               |                                       |                                     |                    |                                    |                                     |               |
|---------------|---------------------------------------|-------------------------------------|--------------------|------------------------------------|-------------------------------------|---------------|
| <b>R33922</b> | rpoB_p.Ser450Leu                      | fabG1_c.-15C>T                      | pncA_c.459_466del  | embB_p.Met306Val                   | gyrA_p.Ala90Val                     | rrs_r.1401a>g |
| <b>R22572</b> | rpoB_p.Ser450Leu                      | fabG1_c.-15C>T,<br>katG_p.Ser315Thr | pncA_p.Cys14Arg    | embB_p.Met306Ile                   | gyrA_p.Asp94Gly                     | rrs_r.1401a>g |
| <b>R9671</b>  | rpoB_p.Ser450Leu                      | ahpC_c.-48G>A,<br>katG_p.Ser315Thr  | pncA_p.Val139Met   | embB_p.Met306Val,<br>embA_c.-16C>T | gyrA_p.Asp94Gly,<br>gyrA_p.Ser91Pro | rrs_r.1401a>g |
| <b>R37378</b> | rpoB_p.Ser450Leu                      | fabG1_c.-15C>T,<br>katG_p.Ser315Thr | pncA_p.Cys14Arg    | embB_p.Met306Ile                   | gyrA_p.Asp94Gly                     | rrs_r.1401a>g |
| <b>R6932</b>  | rpoB_p.Asp435Val                      | fabG1_c.-17G>T,<br>katG_p.Ser315Thr | pncA_c.517_518insG | embB_p.Met306Ile                   | gyrA_p.Asp94Gly                     | rrs_r.1401a>g |
| <b>R6702</b>  | rpoB_p.Ser450Leu                      | fabG1_c.-15C>T,<br>katG_p.Ser315Thr | pncA_p.Cys14Arg    | embB_p.Met306Ile                   | gyrA_p.Gly88Cys                     | rrs_r.1401a>g |
| <b>R21689</b> | rpoB_p.Ser450Leu                      | fabG1_c.-15C>T,<br>katG_p.Ser315Thr | pncA_p.Cys14Arg    | embB_p.Met306Ile                   | gyrA_p.Asp94Gly                     | rrs_r.1401a>g |
| <b>R34001</b> | rpoB_p.Ser450Leu                      | ahpC_c.-48G>A,<br>katG_p.Ser315Thr  | pncA_p.Val139Met   | embB_p.Met306Val                   | gyrA_p.Ala90Val                     | rrs_r.1401a>g |
| <b>R18174</b> | rpoB_p.Ser450Leu                      | fabG1_c.-15C>T,<br>inhA_p.Ile194Thr | -                  | embB_p.Met306Val                   | gyrA_p.Asp94Ala                     | rrs_r.1401a>g |
| <b>R12052</b> | rpoB_p.Ser450Leu                      | fabG1_c.-15C>T,<br>katG_p.Ser315Thr | pncA_p.Cys14Arg    | embB_p.Met306Ile                   | gyrB_p.Arg446Cys                    | rrs_r.1401a>g |
| <b>R11687</b> | rpoB_p.Ser450Leu                      | fabG1_c.-15C>T,<br>katG_p.Ser315Thr | pncA_p.Cys14Arg    | embB_p.Met306Ile                   | gyrA_p.Asp94Gly                     | rrs_r.1401a>g |
| <b>X7</b>     | rpoB_p.Asp435Val                      | fabG1_c.-17G>T,<br>katG_p.Ser315Thr | pncA_c.517_518insG | embB_p.Met306Ile                   | gyrA_p.Asp94Gly                     | rrs_r.1401a>g |
| <b>R19048</b> | rpoB_p.Ser450Leu                      | fabG1_c.-15C>T,<br>katG_p.Ser315Thr | pncA_p.Cys14Arg    | embB_p.Met306Ile                   | gyrA_p.Asp94Gly                     | rrs_r.1401a>g |
| <b>R4489</b>  | rpoB_p.Ser450Leu                      | fabG1_c.-15C>T,<br>katG_p.Ser315Thr | pncA_p.Cys14Arg    | embB_p.Met306Ile                   | gyrA_p.Asp94Gly                     | rrs_r.1401a>g |
| <b>R31891</b> | rpoB_p.Ser450Leu                      | fabG1_c.-15C>T,<br>inhA_p.Ile194Thr | pncA_p.Asp8Asn     | embB_p.Met306Val                   | gyrA_p.Ser91Pro                     | rrs_r.1401a>g |
| <b>R27080</b> | rpoB_p.Ser450Leu,<br>rpoC_p.Leu527Val | fabG1_c.-15C>T,<br>inhA_p.Ile194Thr | -                  | embB_p.Met306Val                   | gyrA_p.Ala90Val                     | rrs_r.1401a>g |
| <b>R22688</b> | rpoB_p.Ser450Leu                      | katG_p.Ser315Thr                    | pncA_p.Asp8Asn     | embB_p.Met306Val                   | gyrA_p.Asp94Gly                     | rrs_r.1401a>g |
| <b>R14756</b> | rpoB_p.Ser450Leu                      | fabG1_c.-15C>T,<br>inhA_p.Ile194Thr | pncA_p.Val130Ala   | embB_p.Met306Val                   | gyrA_p.Asp94Gly                     | rrs_r.1401a>g |
| <b>R13166</b> | rpoB_p.Ser450Leu                      | fabG1_c.-15C>T,<br>katG_p.Ser315Thr | pncA_p.Cys14Arg    | embB_p.Met306Ile                   | gyrA_p.Asp94Gly                     | rrs_r.1401a>g |
| <b>R15305</b> | rpoB_p.Ser450Leu                      | fabG1_c.-15C>T                      | -                  | -                                  | gyrA_p.Asp94Gly                     | rrs_r.1401a>g |
| <b>R30446</b> | rpoB_p.Ser450Leu                      | fabG1_c.-15C>T,<br>inhA_p.Ile194Thr | pncA_p.Asp8Asn     | embB_p.Met306Val                   | gyrA_p.Ser91Pro                     | rrs_r.1401a>g |

|               |                                       |                                     |                    |                  |                  |               |
|---------------|---------------------------------------|-------------------------------------|--------------------|------------------|------------------|---------------|
| <b>R14489</b> | rpoB_p.Ser450Leu                      | fabG1_c.-15C>T,<br>inhA_p.Ile194Thr | pncA_p.Val130Ala   | embB_p.Met306Val | gyrA_p.Asp94Gly  | rrs_r.1401a>g |
| <b>R21213</b> | rpoB_p.Ser450Leu                      | fabG1_c.-15C>T,<br>inhA_p.Ile194Thr | pncA_p.Asp8Asn     | embB_p.Met306Val | gyrA_p.Asp94Gly  | rrs_r.1401a>g |
| <b>R29897</b> | rpoB_p.Asp435Gly,<br>rpoB_p.Leu452Pro | fabG1_c.-8T>A,<br>katG_p.Ser315Thr  | pncA_c.456_457insC | embB_p.Met306Val | gyrA_p.Ala90Val  | rrs_r.1401a>g |
| <b>R37359</b> | rpoB_p.Ser450Leu                      | fabG1_c.-15C>T,<br>katG_p.Ser315Thr | pncA_p.Cys14Arg    | embB_p.Met306Ile | gyrA_p.Asp94Gly  | rrs_r.1401a>g |
| <b>R34514</b> | rpoB_p.Ser450Leu                      | fabG1_c.-15C>T,<br>katG_p.Ser315Thr | pncA_p.Cys14Arg    | embB_p.Met306Ile | gyrA_p.Ala90Val  | rrs_r.1401a>g |
| <b>R10398</b> | rpoB_p.Asp435Gly,<br>rpoB_p.Leu452Pro | fabG1_c.-8T>A,<br>katG_p.Ser315Thr  | pncA_c.456_457insC | embB_p.Met306Val | gyrA_p.Ala90Val  | rrs_r.1401a>g |
| <b>R17281</b> | rpoB_p.Ser450Leu                      | fabG1_c.-15C>T,<br>katG_p.Ser315Thr | pncA_p.Cys14Arg    | embB_p.Met306Ile | gyrA_p.Asp94Gly  | rrs_r.1401a>g |
| <b>R2969</b>  | rpoB_p.Ser450Leu                      | fabG1_c.-15C>T                      | pncA_p.Tyr103*     | embB_p.Asp354Ala | gyrA_p.Asp94Gly  | rrs_r.1401a>g |
| <b>X91</b>    | rpoB_p.Asp435Val                      | fabG1_c.-17G>T,<br>katG_p.Ser315Thr | pncA_c.517_518insG | embB_p.Met306Ile | gyrA_p.Asp94His  | rrs_r.1401a>g |
| <b>R28468</b> | rpoB_p.Asp435Val                      | fabG1_c.-17G>T,<br>katG_p.Ser315Thr | pncA_c.517_518insG | embB_p.Met306Ile | gyrA_p.Asp94Asn  | rrs_r.1401a>g |
| <b>R24211</b> | rpoB_p.Ser450Leu                      | fabG1_c.-15C>T,<br>inhA_p.Ile194Thr | pncA_p.Asp8Asn     | embB_p.Met306Val | gyrA_p.Ser91Pro  | rrs_r.1401a>g |
| <b>R12425</b> | rpoB_p.Asp435Val                      | fabG1_c.-17G>T,<br>katG_p.Ser315Thr | pncA_c.517_518insG | embB_p.Met306Ile | gyrA_p.Ala90Val  | rrs_r.1401a>g |
| <b>R23866</b> | rpoB_p.Ser450Leu                      | ahpC_c.-48G>A,<br>katG_p.Ser315Thr  | pncA_p.Val139Met   | embB_p.Met306Val | gyrA_p.Asp94Asn  | rrs_r.1401a>g |
| <b>R13560</b> | rpoB_p.Asp435Val                      | fabG1_c.-17G>T,<br>katG_p.Ser315Thr | pncA_c.517_518insG | embB_p.Met306Ile | gyrA_p.Asp94Gly  | rrs_r.1401a>g |
| <b>R18028</b> | rpoB_p.Ser450Leu                      | fabG1_c.-15C>T                      | -                  | embB_p.Met306Val | gyrA_p.Asp94Ala  | rrs_r.1401a>g |
| <b>R36404</b> | rpoB_p.Asp435Val                      | fabG1_c.-17G>T,<br>katG_p.Ser315Thr | pncA_c.517_518insG | embB_p.Met306Ile | gyrA_p.Asp94Gly  | rrs_r.1401a>g |
| <b>R22911</b> | rpoB_p.Ser450Leu                      | fabG1_c.-15C>T,<br>katG_p.Ser315Thr | pncA_p.Cys14Arg    | embB_p.Met306Ile | gyrA_p.Asp94Gly  | rrs_r.1401a>g |
| <b>R31329</b> | rpoB_p.Ser450Leu                      | katG_p.Ser315Thr                    | pncA_p.Asp8Asn     | embB_p.Met306Val | gyrA_p.Asp94Gly  | rrs_r.1401a>g |
| <b>X2</b>     | rpoB_p.Ser450Leu                      | fabG1_c.-15C>T,<br>inhA_p.Ile194Thr | pncA_p.Asp8Asn     | embB_p.Met306Val | gyrB_p.Glu501Asp | rrs_r.1401a>g |
| <b>R19406</b> | rpoB_p.Ser450Leu                      | fabG1_c.-15C>T,<br>katG_p.Ser315Thr | pncA_p.Cys14Arg    | embB_p.Met306Ile | gyrA_p.Asp94Gly  | rrs_r.1401a>g |
| <b>R15282</b> | rpoB_p.Ser450Leu                      | fabG1_c.-15C>T,<br>inhA_p.Ile194Thr | pncA_p.Ser164Pro   | embB_p.Met306Val | gyrA_p.Asp94Ala  | rrs_r.1401a>g |

|               |                  |                                     |                    |                                       |                 |               |
|---------------|------------------|-------------------------------------|--------------------|---------------------------------------|-----------------|---------------|
| <b>R4221</b>  | rpoB_p.Ser450Leu | fabG1_c.-15C>T,<br>katG_p.Ser315Thr | pncA_p.Cys14Arg    | embB_p.Met306Ile                      | gyrA_p.Asp94Gly | rrs_r.1401a>g |
| <b>R27276</b> | rpoB_p.Asp435Val | fabG1_c.-17G>T,<br>katG_p.Ser315Thr | pncA_c.517_518insG | embB_p.Met306Ile                      | gyrA_p.Asp94Asn | rrs_r.1401a>g |
| <b>R34184</b> | rpoB_p.Ser450Leu | katG_p.Ser315Thr                    | pncA_p.Asp8Asn     | embB_p.Met306Val                      | gyrA_p.Asp94Gly | rrs_r.1401a>g |
| <b>R18700</b> | rpoB_p.Ser450Leu | fabG1_c.-15C>T,<br>katG_p.Ser315Thr | pncA_p.Cys14Arg    | embB_p.Met306Ile                      | gyrA_p.Asp94Gly | rrs_r.1401a>g |
| <b>R20367</b> | rpoB_p.Ser450Leu | fabG1_c.-15C>T,<br>inhA_p.Ile194Thr | pncA_p.Thr135Pro   | embB_p.Met306Val                      | gyrA_p.Ala90Val | rrs_r.1401a>g |
| <b>R29551</b> | rpoB_p.Ser450Leu | fabG1_c.-15C>T,<br>katG_p.Ser315Thr | pncA_p.Cys14Arg    | embB_p.Met306Ile                      | gyrA_p.Ala90Val | rrs_r.1401a>g |
| <b>R17581</b> | rpoB_p.Asp435Val | fabG1_c.-17G>T,<br>katG_p.Ser315Thr | pncA_c.517_518insG | embB_p.Met306Ile                      | gyrA_p.Ala90Val | rrs_r.1401a>g |
| <b>R14876</b> | rpoB_p.Asp435Val | fabG1_c.-17G>T,<br>katG_p.Ser315Thr | pncA_c.517_518insG | embB_p.Met306Ile                      | gyrA_p.Asp94Gly | rrs_r.1401a>g |
| <b>R35808</b> | rpoB_p.Asp435Val | fabG1_c.-17G>T,<br>katG_p.Ser315Thr | pncA_c.517_518insG | embB_p.Met306Ile                      | gyrA_p.Asp94Gly | rrs_r.1401a>g |
| <b>R9951</b>  | rpoB_p.Asp435Val | fabG1_c.-17G>T,<br>katG_p.Ser315Thr | pncA_c.517_518insG | embB_p.Met306Ile                      | gyrA_p.Asp94Gly | rrs_r.1401a>g |
| <b>R6705</b>  | rpoB_p.Asp435Val | fabG1_c.-17G>T,<br>katG_p.Ser315Thr | pncA_c.517_518insG | embB_p.Met306Ile                      | gyrA_p.Asp94Gly | rrs_r.1401a>g |
| <b>R21826</b> | rpoB_p.Asp435Val | fabG1_c.-17G>T,<br>katG_p.Ser315Thr | pncA_c.517_518insG | embB_p.Met306Ile                      | gyrA_p.Asp94Gly | rrs_r.1401a>g |
| <b>R26892</b> | rpoB_p.Asp435Val | fabG1_c.-17G>T,<br>katG_p.Ser315Thr | pncA_c.517_518insG | embB_p.Met306Ile                      | gyrA_p.Asp94Gly | rrs_r.1401a>g |
| <b>R26725</b> | rpoB_p.Ser450Leu | fabG1_c.-15C>T,<br>inhA_p.Ile194Thr | -                  | embB_p.Met306Val                      | gyrA_p.Asp94Ala | rrs_r.1401a>g |
| <b>R33910</b> | rpoB_p.Ser450Leu | fabG1_c.-15C>T                      | -                  | -                                     | gyrA_p.Ala90Val | rrs_r.1401a>g |
| <b>R9941</b>  | rpoB_p.Asp435Val | fabG1_c.-17G>T,<br>katG_p.Ser315Thr | pncA_c.517_518insG | embB_p.Met306Ile                      | gyrA_p.Asp94Asn | rrs_r.1401a>g |
| <b>R8666</b>  | rpoB_p.Ser450Leu | fabG1_c.-15C>T,<br>katG_p.Ser315Thr | -                  | embB_p.Gln497Arg                      | gyrA_p.Ala90Val | rrs_r.1401a>g |
| <b>R31630</b> | rpoB_p.Ser450Leu | fabG1_c.-8T>A,<br>katG_p.Ser315Thr  | pncA_p.Cys14Arg    | embB_p.Met306Ile,<br>embB_p.Gln497Lys | gyrA_p.Ser91Pro | rrs_r.1401a>g |
| <b>R19882</b> | rpoB_p.Asp435Val | fabG1_c.-17G>T,<br>katG_p.Ser315Thr | pncA_c.517_518insG | embB_p.Met306Ile                      | gyrA_p.Asp94Asn | rrs_r.1401a>g |
| <b>R20189</b> | rpoB_p.Ser450Leu | fabG1_c.-15C>T                      | pncA_p.Tyr103*     | -                                     | gyrA_p.Ser91Pro | rrs_r.1401a>g |
| <b>R29125</b> | rpoB_p.Ser450Leu | katG_p.Ser315Thr                    | pncA_p.Asp8Asn     | embB_p.Met306Val                      | gyrA_p.Asp94Gly | rrs_r.1401a>g |

|               |                  |                                     |                    |                  |                 |               |
|---------------|------------------|-------------------------------------|--------------------|------------------|-----------------|---------------|
| <b>R20073</b> | rpoB_p.Ser450Leu | fabG1_c.-15C>T,<br>katG_p.Ser315Thr | pncA_p.Cys14Arg    | embB_p.Met306Ile | gyrA_p.Asp94Gly | rrs_r.1401a>g |
| <b>R18369</b> | rpoB_p.Asp435Val | fabG1_c.-17G>T,<br>katG_p.Ser315Thr | pncA_c.517_518insG | embB_p.Met306Ile | gyrA_p.Ala90Val | rrs_r.1401a>g |
| <b>R22740</b> | rpoB_p.Ser450Leu | fabG1_c.-15C>T,<br>katG_p.Ser315Thr | pncA_p.Cys14Arg    | embB_p.Met306Ile | gyrA_p.Ser91Pro | rrs_r.1401a>g |
| <b>R29799</b> | rpoB_p.Ser450Leu | fabG1_c.-15C>T,<br>katG_p.Ser315Thr | pncA_p.Cys14Arg    | embB_p.Met306Ile | gyrA_p.Asp94Gly | rrs_r.1401a>g |
| <b>R39462</b> | rpoB_p.Asp435Tyr | katG_p.Ser315Thr                    | -                  | embA_c.-16C>G    | gyrA_p.Asp94Gly | rrs_r.1401a>g |
| <b>R38964</b> | rpoB_p.Asp435Val | fabG1_c.-17G>T,<br>katG_p.Ser315Thr | pncA_c.517_518insG | embB_p.Met306Ile | gyrA_p.Asp94Gly | rrs_r.1401a>g |
| <b>R4933</b>  | rpoB_p.Ser450Leu | katG_p.Ser315Thr                    | pncA_p.Asp8Asn     | embB_p.Met306Val | gyrA_p.Asp94Gly | rrs_r.1401a>g |
| <b>R28700</b> | rpoB_p.Asp435Val | fabG1_c.-17G>T,<br>katG_p.Ser315Thr | pncA_c.517_518insG | embB_p.Met306Ile | gyrA_p.Asp94Asn | rrs_r.1401a>g |
| <b>R17064</b> | rpoB_p.Ser450Leu | fabG1_c.-15C>T,<br>katG_p.Ser315Thr | pncA_p.Cys14Arg    | embB_p.Met306Ile | gyrA_p.Asp94Tyr | rrs_r.1401a>g |
| <b>R4203</b>  | rpoB_p.Ser450Leu | fabG1_c.-15C>T,<br>katG_p.Ser315Thr | pncA_p.Cys14Arg    | embB_p.Met306Ile | gyrA_p.Asp94Gly | rrs_r.1401a>g |
| <b>R33225</b> | rpoB_p.Ser450Leu | fabG1_c.-15C>T,<br>katG_p.Ser315Thr | pncA_p.Cys14Arg    | embB_p.Met306Ile | gyrA_p.Asp94Tyr | rrs_r.1401a>g |
| <b>R23197</b> | rpoB_p.Ser450Leu | fabG1_c.-15C>T,<br>katG_p.Ser315Thr | pncA_p.Cys14Arg    | embB_p.Met306Ile | gyrA_p.Gly88Cys | rrs_r.1401a>g |
| <b>R20964</b> | rpoB_p.Asp435Val | fabG1_c.-17G>T,<br>katG_p.Ser315Thr | pncA_c.517_518insG | embB_p.Met306Ile | gyrA_p.Asp94Asn | rrs_r.1401a>g |
| <b>R27500</b> | rpoB_p.Ser450Leu | fabG1_c.-15C>T,<br>inhA_p.Ile194Thr | pncA_p.Val130Ala   | embB_p.Met306Val | gyrA_p.Asp94Gly | rrs_r.1401a>g |
| <b>R17084</b> | rpoB_p.Ser450Leu | fabG1_c.-15C>T,<br>katG_p.Ser315Thr | pncA_p.Cys14Arg    | embB_p.Met306Ile | gyrA_p.Asp94Tyr | rrs_r.1401a>g |
| <b>R18920</b> | rpoB_p.Ser450Leu | fabG1_c.-15C>T,<br>katG_p.Ser315Thr | pncA_p.Cys14Arg    | embB_p.Met306Ile | gyrA_p.Asp94Ala | rrs_r.1401a>g |
| <b>R27303</b> | rpoB_p.Ser450Leu | fabG1_c.-15C>T,<br>inhA_p.Ile194Thr | pncA_p.Asp8Asn     | embB_p.Met306Val | gyrA_p.Ser91Pro | rrs_r.1401a>g |
| <b>R17203</b> | rpoB_p.Ser450Leu | fabG1_c.-15C>T,<br>katG_p.Ser315Thr | pncA_p.Cys14Arg    | embB_p.Met306Ile | gyrA_p.Gly88Cys | rrs_r.1401a>g |
| <b>R31399</b> | rpoB_p.Ser450Leu | fabG1_c.-15C>T,<br>katG_p.Ser315Thr | pncA_p.Cys14Arg    | embB_p.Met306Ile | gyrA_p.Ala90Val | rrs_r.1401a>g |
| <b>R5620</b>  | rpoB_p.Asp435Val | fabG1_c.-17G>T,<br>katG_p.Ser315Thr | pncA_c.517_518insG | embB_p.Met306Ile | gyrA_p.Ala90Val | rrs_r.1401a>g |
| <b>X39</b>    | rpoB_p.Asp435Val | fabG1_c.-17G>T,<br>katG_p.Ser315Thr | pncA_c.517_518insG | embB_p.Met306Ile | gyrA_p.Asp94Ala | rrs_r.1401a>g |

|               |                                       |                                     |                    |                                       |                  |               |
|---------------|---------------------------------------|-------------------------------------|--------------------|---------------------------------------|------------------|---------------|
| <b>R19628</b> | rpoB_p.Ser450Leu                      | fabG1_c.-15C>T,<br>katG_p.Ser315Thr | pncA_p.Cys14Arg    | embB_p.Met306Ile                      | gyrA_p.Asp94Gly  | rrs_r.1401a>g |
| <b>R9673</b>  | rpoB_p.Ser450Leu                      | fabG1_c.-15C>T,<br>katG_p.Ser315Thr | pncA_p.Cys14Arg    | embB_p.Met306Ile                      | gyrA_p.Gly88Cys  | rrs_r.1401a>g |
| <b>R19005</b> | rpoB_p.Ser450Leu                      | katG_p.Ser315Thr                    | pncA_p.Cys14Arg    | embB_p.Met306Ile,<br>embB_p.Gln497Lys | gyrA_p.Ala90Val  | rrs_r.1401a>g |
| <b>R15310</b> | rpoB_p.Asp435Val                      | fabG1_c.-17G>T,<br>katG_p.Ser315Thr | pncA_c.517_518insG | embB_p.Met306Ile                      | gyrA_p.Asp94Ala  | rrs_r.1401a>g |
| <b>R12550</b> | rpoB_p.Asp435Val                      | fabG1_c.-17G>T,<br>katG_p.Ser315Thr | pncA_c.517_518insG | embB_p.Met306Ile                      | gyrA_p.Asp94Gly  | rrs_r.1401a>g |
| <b>R16923</b> | rpoB_p.Ser450Leu                      | fabG1_c.-15C>T,<br>katG_p.Ser315Thr | pncA_p.Cys14Arg    | embB_p.Met306Ile                      | gyrA_p.Asp94Gly  | rrs_r.1401a>g |
| <b>R28945</b> | rpoB_p.Ser450Leu                      | fabG1_c.-15C>T,<br>katG_p.Ser315Thr | pncA_p.Cys14Arg    | embB_p.Met306Ile                      | gyrA_p.Asp94Gly  | rrs_r.1401a>g |
| <b>R5317</b>  | rpoB_p.Ser450Leu                      | fabG1_c.-15C>T,<br>katG_p.Ser315Thr | pncA_p.Cys14Arg    | embB_p.Met306Ile                      | gyrA_p.Asp94Gly  | rrs_r.1401a>g |
| <b>R32291</b> | rpoB_p.Asp435Val                      | fabG1_c.-17G>T,<br>katG_p.Ser315Thr | pncA_c.517_518insG | embB_p.Met306Ile                      | gyrA_p.Asp94Gly  | rrs_r.1401a>g |
| <b>R19725</b> | rpoB_p.Asp435Gly,<br>rpoB_p.Leu452Pro | fabG1_c.-8T>A,<br>katG_p.Ser315Thr  | pncA_c.456_457insC | embB_p.Met306Val                      | gyrA_p.Ala90Val  | rrs_r.1401a>g |
| <b>R9126</b>  | rpoB_p.Asp435Val                      | fabG1_c.-17G>T,<br>katG_p.Ser315Thr | pncA_c.517_518insG | embB_p.Met306Ile                      | gyrA_p.Asp94Asn  | rrs_r.1401a>g |
| <b>R15957</b> | rpoB_p.Ser450Leu                      | fabG1_c.-15C>T,<br>katG_p.Ser315Thr | pncA_p.Cys14Arg    | embB_p.Met306Ile                      | gyrA_p.Ala90Val  | rrs_r.1401a>g |
| <b>R4524</b>  | rpoB_p.Ser450Leu                      | fabG1_c.-15C>T,<br>katG_p.Ser315Thr | pncA_p.Cys14Arg    | embB_p.Met306Ile                      | gyrA_p.Asp94Gly  | rrs_r.1401a>g |
| <b>R9779</b>  | rpoB_p.Ser450Leu                      | fabG1_c.-15C>T,<br>inhA_p.Ile194Thr | pncA_p.Thr135Pro   | embB_p.Met306Val                      | gyrA_p.Ala90Val  | rrs_r.1401a>g |
| <b>R33494</b> | rpoB_p.Asp435Val                      | fabG1_c.-17G>T,<br>katG_p.Ser315Thr | pncA_c.517_518insG | embB_p.Met306Ile                      | gyrA_p.Asp94Gly  | rrs_r.1401a>g |
| <b>R17926</b> | rpoB_p.Ser450Leu                      | fabG1_c.-15C>T,<br>katG_p.Ser315Thr | pncA_p.Cys14Arg    | embB_p.Met306Ile                      | gyrA_p.Asp94Tyr  | rrs_r.1401a>g |
| <b>R33916</b> | rpoB_p.Ser450Leu                      | fabG1_c.-15C>T,<br>katG_p.Ser315Thr | pncA_p.Cys14Arg    | embB_p.Met306Ile                      | gyrA_p.Asp94Gly  | rrs_r.1401a>g |
| <b>R13673</b> | rpoB_p.Asp435Val                      | fabG1_c.-17G>T,<br>katG_p.Ser315Thr | pncA_c.517_518insG | embB_p.Met306Ile                      | gyrA_p.Asp94Asn  | rrs_r.1401a>g |
| <b>R27501</b> | rpoB_p.Ser450Leu,<br>rpoC_p.Phe452Ser | ahpC_c.-48G>A,<br>katG_p.Ser315Thr  | pncA_p.Val139Met   | embB_p.Met306Val                      | gyrB_p.Asp461His | rrs_r.1401a>g |
| <b>R16826</b> | rpoB_p.Ser450Leu                      | fabG1_c.-15C>T,<br>katG_p.Ser315Thr | pncA_p.Cys14Arg    | embB_p.Met306Ile                      | gyrA_p.Asp94Gly  | rrs_r.1401a>g |

|               |                                       |                                     |                    |                  |                                      |               |
|---------------|---------------------------------------|-------------------------------------|--------------------|------------------|--------------------------------------|---------------|
| <b>R32208</b> | rpoB_p.Ser450Leu                      | fabG1_c.-15C>T,<br>katG_p.Ser315Thr | pncA_p.Cys14Arg    | embB_p.Met306Ile | gyrA_p.Asp94Tyr                      | rrs_r.1401a>g |
| <b>X49</b>    | rpoB_p.Asp435Val                      | fabG1_c.-17G>T,<br>katG_p.Ser315Thr | pncA_c.517_518insG | embB_p.Met306Ile | gyrA_p.Asp94Asn                      | rrs_r.1401a>g |
| <b>R9047</b>  | rpoB_p.Ser450Leu                      | fabG1_c.-15C>T,<br>katG_p.Ser315Thr | pncA_p.Cys14Arg    | embB_p.Met306Ile | gyrA_p.Asp94Gly                      | rrs_r.1401a>g |
| <b>R10854</b> | rpoB_p.Ser450Leu,<br>rpoC_p.Leu527Val | fabG1_c.-15C>T,<br>inhA_p.Ile194Thr | -                  | embB_p.Met306Val | gyrA_p.Ala90Val                      | rrs_r.1401a>g |
| <b>R23384</b> | rpoB_p.Asp435Val                      | fabG1_c.-17G>T,<br>katG_p.Ser315Thr | pncA_c.517_518insG | embB_p.Met306Ile | gyrA_p.Asp94Gly                      | rrs_r.1401a>g |
| <b>R17830</b> | rpoB_p.Ser450Leu                      | fabG1_c.-15C>T,<br>katG_p.Ser315Thr | pncA_p.Cys14Arg    | embB_p.Met306Ile | gyrA_p.Asp94Tyr                      | rrs_r.1401a>g |
| <b>R26851</b> | rpoB_p.Ser450Leu                      | fabG1_c.-15C>T,<br>katG_p.Ser315Thr | pncA_p.Cys14Arg    | embB_p.Met306Ile | gyrA_p.Asp94Gly                      | rrs_r.1401a>g |
| <b>R23853</b> | rpoB_p.Asp435Val                      | fabG1_c.-17G>T,<br>katG_p.Ser315Thr | pncA_c.517_518insG | embB_p.Met306Ile | gyrA_p.Ala90Val                      | rrs_r.1401a>g |
| <b>R19816</b> | rpoB_p.Ser450Leu                      | fabG1_c.-15C>T,<br>katG_p.Ser315Thr | pncA_p.Cys14Arg    | embB_p.Met306Ile | gyrA_p.Asp94Gly                      | rrs_r.1401a>g |
| <b>R3889</b>  | rpoB_p.Ser450Leu                      | fabG1_c.-15C>T,<br>katG_p.Ser315Thr | pncA_p.Cys14Arg    | embB_p.Met306Ile | gyrB_p.Asp461Asn                     | rrs_r.1401a>g |
| <b>R16323</b> | rpoB_p.Ser450Leu                      | fabG1_c.-15C>T,<br>inhA_p.Ile194Thr | -                  | embB_p.Met306Val | gyrA_p.Asp94Ala                      | rrs_r.1401a>g |
| <b>R38942</b> | rpoB_p.Ser450Leu                      | fabG1_c.-15C>T,<br>inhA_p.Ile194Thr | -                  | embB_p.Met306Val | gyrA_p.Asp94Ala                      | rrs_r.1401a>g |
| <b>R15100</b> | rpoB_p.Ser450Leu                      | fabG1_c.-15C>T,<br>inhA_p.Ile194Thr | -                  | embB_p.Met306Val | gyrA_p.Asp94Gly                      | rrs_r.1401a>g |
| <b>R33918</b> | rpoB_p.Ser450Leu                      | fabG1_c.-15C>T,<br>katG_p.Ser315Thr | pncA_p.Cys14Arg    | embB_p.Met306Ile | gyrA_p.Asp94Gly                      | rrs_r.1401a>g |
| <b>R23604</b> | rpoB_p.Ser450Leu                      | fabG1_c.-15C>T,<br>inhA_p.Ile194Thr | pncA_p.Val130Ala   | embB_p.Met306Val | gyrA_p.Asp94Gly                      | rrs_r.1401a>g |
| <b>R33917</b> | rpoB_p.Ser450Leu                      | fabG1_c.-15C>T,<br>katG_p.Ser315Thr | pncA_p.Cys14Arg    | embB_p.Met306Ile | gyrA_p.Asp94Gly                      | rrs_r.1401a>g |
| <b>R5166</b>  | rpoB_p.Ser450Leu                      | fabG1_c.-15C>T                      | -                  | embB_p.Met306Val | gyrB_p.Arg446Cys                     | rrs_r.1401a>g |
| <b>R15539</b> | rpoB_p.Ser450Leu                      | fabG1_c.-15C>T,<br>katG_p.Ser315Thr | pncA_p.Cys14Arg    | embB_p.Met306Ile | gyrA_p.Asp94Asn                      | rrs_r.1401a>g |
| <b>X173</b>   | rpoB_p.Ser450Leu                      | fabG1_c.-15C>T,<br>katG_p.Ser315Thr | pncA_p.Cys14Arg    | embB_p.Met306Ile | gyrB_p.Asp461Asn                     | rrs_r.1401a>g |
| <b>R27650</b> | rpoB_p.Ser450Leu                      | fabG1_c.-15C>T,<br>katG_p.Ser315Thr | pncA_p.Cys14Arg    | embB_p.Met306Ile | gyrB_p.Asp461Asn,<br>gyrA_p.Ala90Val | rrs_r.1401a>g |

|               |                                       |                                     |                    |                                        |                  |               |
|---------------|---------------------------------------|-------------------------------------|--------------------|----------------------------------------|------------------|---------------|
| <b>R9345</b>  | rpoB_p.Ser450Leu                      | fabG1_c.-15C>T,<br>inhA_p.Ile194Thr | -                  | embB_p.Met306Val                       | gyrA_p.Asp94Ala  | rrs_r.1401a>g |
| <b>R13923</b> | rpoB_p.His445Asp                      | fabG1_c.-15C>T                      | pncA_p.Thr142Met   | -                                      | gyrA_p.Asp94Asn  | -             |
| <b>R19726</b> | rpoB_p.Asp435Gly,<br>rpoB_p.Leu452Pro | fabG1_c.-8T>A,<br>katG_p.Ser315Thr  | pncA_c.456_457insC | embB_p.Met306Val                       | gyrA_p.Ala90Val  | rrs_r.1401a>g |
| <b>R23839</b> | rpoB_p.Asp435Val                      | fabG1_c.-17G>T,<br>katG_p.Ser315Thr | pncA_c.517_518insG | embB_p.Met306Ile                       | gyrA_p.Asp94Gly  | rrs_r.1401a>g |
| <b>R19512</b> | rpoB_p.Ser450Leu                      | fabG1_c.-15C>T,<br>katG_p.Ser315Thr | pncA_p.Cys14Arg    | embB_p.Met306Ile                       | gyrA_p.Asp94Tyr  | rrs_r.1401a>g |
| <b>R3983</b>  | rpoB_p.Asp435Val                      | fabG1_c.-17G>T,<br>katG_p.Ser315Thr | pncA_c.517_518insG | embB_p.Met306Ile                       | gyrA_p.Asp94Gly  | rrs_r.1401a>g |
| <b>R30937</b> | rpoB_p.Ser450Leu                      | katG_p.Ser315Thr                    | pncA_p.Asp8Asn     | embB_p.Met306Val                       | gyrA_p.Asp94Ala  | -             |
| <b>X50</b>    | rpoB_p.Ser450Leu                      | fabG1_c.-8T>A,<br>katG_p.Ser315Thr  | pncA_c.389_389del  | embB_p.Asp1024Asn,<br>embB_p.Met306Ile | gyrA_p.Asp94Asn  | rrs_r.1401a>g |
| <b>R35856</b> | rpoB_p.Asp435Val                      | fabG1_c.-17G>T,<br>katG_p.Ser315Thr | pncA_c.517_518insG | embB_p.Met306Ile                       | gyrA_p.Asp94Gly  | rrs_r.1401a>g |
| <b>R22123</b> | rpoB_p.Ser450Leu                      | katG_p.Ser315Thr                    | pncA_p.Asp8Asn     | embB_p.Met306Val                       | gyrA_p.Asp94Gly  | rrs_r.1401a>g |
| <b>R11044</b> | rpoB_p.Asp435Val                      | fabG1_c.-17G>T,<br>katG_p.Ser315Thr | pncA_c.517_518insG | embB_p.Met306Ile                       | gyrA_p.Ala90Val  | rrs_r.1401a>g |
| <b>R22654</b> | rpoB_p.Ser450Leu                      | fabG1_c.-15C>T,<br>inhA_p.Ile194Thr | pncA_p.Val130Ala   | embB_p.Met306Val                       | gyrA_p.Asp94Gly  | rrs_r.1401a>g |
| <b>R15167</b> | rpoB_p.Asp435Tyr                      | katG_p.Ser315Thr                    | -                  | embA_c.-16C>G                          | gyrB_p.Glu501Asp | rrs_r.1401a>g |
| <b>R18977</b> | rpoB_p.Ser450Leu                      | fabG1_c.-15C>T                      | pncA_p.Tyr103*     | embB_p.Met306Val                       | gyrA_p.Asp94Gly  | -             |
| <b>R13121</b> | rpoB_p.Ser450Leu                      | fabG1_c.-15C>T,<br>katG_p.Ser315Thr | pncA_p.Cys14Arg    | embB_p.Met306Ile                       | gyrA_p.Asp94Ala  | rrs_r.1401a>g |
| <b>R15531</b> | rpoB_p.Asp435Val                      | fabG1_c.-17G>T,<br>katG_p.Ser315Thr | pncA_c.517_518insG | embB_p.Met306Ile                       | gyrA_p.Asp94Asn  | rrs_r.1401a>g |
| <b>R8194</b>  | rpoB_p.Ser450Leu                      | fabG1_c.-15C>T,<br>katG_p.Ser315Thr | pncA_p.Cys14Arg    | embB_p.Met306Ile                       | gyrA_p.Asp94Gly  | rrs_r.1401a>g |
| <b>R17085</b> | rpoB_p.Ser450Leu                      | fabG1_c.-15C>T                      | -                  | -                                      | gyrB_p.Glu501Val | rrs_r.1401a>g |
| <b>R32272</b> | rpoB_p.Ser450Leu                      | fabG1_c.-15C>T                      | -                  | embB_p.Met306Val                       | gyrB_p.Arg446Cys | rrs_r.1401a>g |
| <b>R39352</b> | rpoB_p.Ser450Leu                      | katG_p.Ser315Thr                    | pncA_p.Asp8Asn     | embB_p.Met306Val                       | gyrA_p.Asp94Gly  | rrs_r.1401a>g |
| <b>R38892</b> | rpoB_p.Asp435Val                      | fabG1_c.-17G>T,<br>katG_p.Ser315Thr | pncA_c.517_518insG | embB_p.Met306Ile                       | gyrA_p.Ala90Val  | rrs_r.1401a>g |
| <b>R28854</b> | rpoB_p.Ser450Leu                      | fabG1_c.-15C>T,<br>inhA_p.Ile194Thr | -                  | embB_p.Met306Val                       | gyrA_p.Asp94Ala  | rrs_r.1401a>g |



|               |                  |                                     |                    |                                    |                 |               |
|---------------|------------------|-------------------------------------|--------------------|------------------------------------|-----------------|---------------|
| <b>R22918</b> | rpoB_p.Ser450Leu | fabG1_c.-15C>T,<br>inhA_p.Ile194Thr | pncA_p.Ser164Pro   | embB_p.Met306Val                   | gyrA_p.Ala90Val | rrs_r.1401a>g |
| <b>R9191</b>  | rpoB_p.Asp435Val | fabG1_c.-17G>T,<br>katG_p.Ser315Thr | pncA_c.517_518insG | embB_p.Met306Ile                   | gyrA_p.Asp94Gly | rrs_r.1401a>g |
| <b>R4731</b>  | rpoB_p.Asp435Val | fabG1_c.-17G>T,<br>katG_p.Ser315Thr | pncA_c.517_518insG | embB_p.Met306Ile                   | gyrA_p.Asp94His | rrs_r.1401a>g |
| <b>R13071</b> | rpoB_p.Asp435Val | fabG1_c.-17G>T,<br>katG_p.Ser315Thr | pncA_c.517_518insG | embB_p.Met306Ile                   | gyrA_p.Asp94Gly | rrs_r.1401a>g |
| <b>R8247</b>  | rpoB_p.Ser450Leu | fabG1_c.-15C>T,<br>katG_p.Ser315Thr | pncA_p.Cys14Arg    | embB_p.Met306Ile                   | gyrA_p.Ala90Val | rrs_r.1401a>g |
| <b>R21103</b> | rpoB_p.Asp435Val | fabG1_c.-17G>T,<br>katG_p.Ser315Thr | pncA_c.517_518insG | embB_p.Met306Ile                   | gyrA_p.Asp94Gly | rrs_r.1401a>g |
| <b>R3174</b>  | rpoB_p.Ser450Leu | fabG1_c.-15C>T,<br>katG_p.Ser315Thr | pncA_p.Cys14Arg    | embB_p.Met306Ile                   | gyrA_p.Asp94Gly | rrs_r.1401a>g |
| <b>R39195</b> | rpoB_p.Ser450Leu | katG_p.Ser315Thr                    | pncA_p.Asp8Asn     | embB_p.Met306Val                   | gyrA_p.Asp94Gly | rrs_r.1401a>g |
| <b>R4164</b>  | rpoB_p.Ser450Leu | fabG1_c.-15C>T,<br>inhA_p.Ile194Thr | -                  | embB_p.Met306Val                   | gyrA_p.Asp94Ala | rrs_r.1401a>g |
| <b>R28518</b> | rpoB_p.Asp435Val | fabG1_c.-17G>T,<br>katG_p.Ser315Thr | pncA_c.517_518insG | embB_p.Met306Ile                   | gyrA_p.Asp94Ala | rrs_r.1402c>t |
| <b>R20767</b> | rpoB_p.Asp435Val | fabG1_c.-17G>T,<br>katG_p.Ser315Thr | pncA_c.517_518insG | embB_p.Met306Ile                   | gyrA_p.Asp94Gly | rrs_r.1401a>g |
| <b>R22116</b> | rpoB_p.Asp435Val | fabG1_c.-17G>T,<br>katG_p.Ser315Thr | pncA_c.517_518insG | embB_p.Met306Ile                   | gyrA_p.Asp94Gly | rrs_r.1401a>g |
| <b>R7831</b>  | rpoB_p.Ser450Leu | fabG1_c.-15C>T,<br>katG_p.Ser315Thr | pncA_p.Cys14Arg    | embB_p.Met306Ile                   | gyrA_p.Asp94Gly | rrs_r.1401a>g |
| <b>R26863</b> | rpoB_p.Asp435Val | fabG1_c.-17G>T,<br>katG_p.Ser315Thr | pncA_c.517_518insG | embB_p.Met306Ile                   | gyrA_p.Asp94Gly | rrs_r.1401a>g |
| <b>R6596</b>  | rpoB_p.Asp435Val | fabG1_c.-17G>T,<br>katG_p.Ser315Thr | pncA_c.517_518insG | embB_p.Met306Ile                   | gyrA_p.Asp94Tyr | rrs_r.1401a>g |
| <b>R30463</b> | rpoB_p.Asp435Val | fabG1_c.-17G>T,<br>katG_p.Ser315Thr | pncA_c.517_518insG | embB_p.Met306Ile                   | gyrA_p.Asp94Gly | rrs_r.1401a>g |
| <b>X154</b>   | rpoB_p.Asp435Val | fabG1_c.-17G>T,<br>katG_p.Ser315Thr | pncA_c.517_518insG | embB_p.Met306Ile                   | gyrA_p.Asp94Asn | rrs_r.1401a>g |
| <b>R28887</b> | rpoB_p.Ser450Leu | ahpC_c.-48G>A,<br>katG_p.Ser315Thr  | pncA_p.Val139Met   | embB_p.Met306Val,<br>embA_c.-16C>T | gyrA_p.Ala90Val | rrs_r.1401a>g |
| <b>R30207</b> | rpoB_p.Asp435Val | fabG1_c.-17G>T,<br>katG_p.Ser315Thr | pncA_c.517_518insG | embB_p.Met306Ile                   | gyrA_p.Asp94Gly | rrs_r.1401a>g |
| <b>R20321</b> | rpoB_p.Asp435Val | fabG1_c.-17G>T,<br>katG_p.Ser315Thr | pncA_c.517_518insG | embB_p.Met306Ile                   | gyrA_p.Asp94Asn | rrs_r.1401a>g |

|               |                  |                                      |                    |                  |                                      |               |
|---------------|------------------|--------------------------------------|--------------------|------------------|--------------------------------------|---------------|
| <b>R33926</b> | rpoB_p.Ser450Leu | fabG1_c.-15C>T,<br>katG_p.Ser315Thr  | pncA_p.Cys14Arg    | embB_p.Met306Ile | gyrA_p.Gly88Cys                      | rrs_r.1401a>g |
| <b>R11138</b> | rpoB_p.Ser450Leu | fabG1_c.-15C>T,<br>inhA_p.Ile194Thr  | pncA_p.Thr135Pro   | embB_p.Met306Val | gyrA_p.Ala90Val                      | rrs_r.1401a>g |
| <b>R19351</b> | rpoB_p.Asp435Val | fabG1_c.-17G>T,<br>katG_p.Ser315Thr  | pncA_c.517_518insG | embB_p.Met306Ile | gyrA_p.Asp94Asn                      | rrs_r.1401a>g |
| <b>R10319</b> | rpoB_p.Ser450Leu | katG_p.Ser315Thr                     | -                  | embB_p.Met306Ile | gyrA_p.Asp94Gly                      | rrs_r.1401a>g |
| <b>R11493</b> | rpoB_p.Asp435Val | fabG1_c.-17G>T,<br>katG_p.Ser315Thr  | pncA_c.517_518insG | embB_p.Met306Ile | gyrA_p.Asp94Gly                      | rrs_r.1401a>g |
| <b>R33804</b> | rpoB_p.Asp435Val | fabG1_c.-17G>T,<br>katG_p.Ser315Thr  | pncA_c.517_518insG | embB_p.Met306Ile | gyrA_p.Asp94Gly                      | rrs_r.1401a>g |
| <b>R14766</b> | rpoB_p.Ser450Leu | fabG1_c.-15C>T                       | -                  | embB_p.Met306Val | gyrA_p.Ala90Val,<br>gyrB_p.Arg446Cys | rrs_r.1401a>g |
| <b>R26787</b> | rpoB_p.Ser450Leu | fabG1_c.-15C>T,<br>inhA_p.Ile194Thr  | pncA_p.Val130Ala   | embB_p.Met306Val | gyrA_p.Asp94Gly                      | rrs_r.1401a>g |
| <b>R7110</b>  | rpoB_p.Ser450Leu | fabG1_c.-15C>T,<br>katG_p.Ser315Thr  | pncA_p.Cys14Arg    | embB_p.Met306Ile | gyrA_p.Asp94Gly                      | rrs_r.1401a>g |
| <b>R38747</b> | rpoB_p.Ser450Leu | ahpC_c.-48G>A,<br>katG_p.Ser315Thr   | pncA_p.Val139Met   | embB_p.Met306Val | gyrA_p.Ala90Val                      | -             |
| <b>R18774</b> | rpoB_p.Ser450Leu | fabG1_c.-15C>T,<br>katG_p.Ser315Thr  | pncA_p.Cys14Arg    | embB_p.Met306Ile | gyrA_p.Gly88Cys                      | rrs_r.1401a>g |
| <b>R33904</b> | rpoB_p.Ser450Leu | fabG1_c.-15C>T,<br>inhA_p.Ile194Thr  | pncA_p.Thr135Pro   | embB_p.Met306Val | gyrA_p.Ala90Val                      | rrs_r.1401a>g |
| <b>R30454</b> | rpoB_p.Gln432Lys | katG_p.Ser315Thr                     | -                  | embB_p.Met306Val | gyrA_p.Asp94Asn                      | rrs_r.1401a>g |
| <b>R5065</b>  | rpoB_p.Ser450Leu | katG_p.Ser315Thr                     | pncA_p.Gly132Ala   | embB_p.Met306Val | gyrA_p.Asp94Gly                      | rrs_r.1401a>g |
| <b>R31853</b> | rpoB_p.Ser450Leu | katG_p.Ser315Thr,<br>inhA_p.Ser94Ala | pncA_p.Gln10Pro    | embB_p.Gln497Arg | gyrA_p.Asp94Gly                      | -             |
| <b>R8407</b>  | rpoB_p.Ser450Leu | fabG1_c.-15C>T,<br>katG_p.Ser315Thr  | pncA_p.Cys14Arg    | embB_p.Met306Ile | gyrA_p.Asp94Gly                      | rrs_r.1401a>g |
| <b>R6809</b>  | rpoB_p.Ser450Leu | fabG1_c.-15C>T,<br>inhA_p.Ile194Thr  | -                  | embB_p.Met306Val | gyrA_p.Asp94Ala                      | rrs_r.1401a>g |
| <b>R6196</b>  | rpoB_p.Ser450Leu | fabG1_c.-15C>T                       | -                  | -                | gyrA_p.Asp94Asn                      | rrs_r.1401a>g |
| <b>R22034</b> | rpoB_p.Asp435Val | fabG1_c.-17G>T,<br>katG_p.Ser315Thr  | pncA_c.517_518insG | embB_p.Met306Ile | gyrA_p.Asp94Gly                      | rrs_r.1401a>g |
| <b>R5318</b>  | rpoB_p.Ser450Leu | fabG1_c.-15C>T,<br>inhA_p.Ile194Thr  | -                  | embB_p.Met306Val | gyrA_p.Asp94Ala                      | rrs_r.1401a>g |
| <b>R14852</b> | rpoB_p.Ser450Leu | katG_p.Ser315Thr                     | pncA_p.Val139Gly   | embB_p.Met306Val | gyrA_p.Asp94Gly                      | rrs_r.1401a>g |

|               |                                       |                                     |                    |                  |                                     |               |
|---------------|---------------------------------------|-------------------------------------|--------------------|------------------|-------------------------------------|---------------|
| <b>R21754</b> | rpoB_p.Asp435Val                      | fabG1_c.-17G>T,<br>katG_p.Ser315Thr | pncA_c.517_518insG | embB_p.Met306Ile | gyrA_p.Asp94Gly                     | rrs_r.1401a>g |
| <b>R39730</b> | rpoB_p.Ser450Leu                      | fabG1_c.-15C>T,<br>katG_p.Ser315Thr | pncA_p.Cys14Arg    | embB_p.Met306Ile | gyrA_p.Ser91Pro,<br>gyrA_p.Ala90Val | rrs_r.1401a>g |
| <b>R33486</b> | rpoB_p.Asp435Val                      | fabG1_c.-17G>T,<br>katG_p.Ser315Thr | pncA_c.517_518insG | embB_p.Met306Ile | gyrA_p.Asp94Asn                     | rrs_r.1401a>g |
| <b>R19404</b> | rpoB_p.Ser450Leu                      | fabG1_c.-15C>T,<br>katG_p.Ser315Thr | pncA_p.Cys14Arg    | embB_p.Met306Ile | gyrA_p.Asp94Gly                     | rrs_r.1401a>g |
| <b>R18343</b> | rpoB_p.Ser450Leu                      | fabG1_c.-15C>T,<br>inhA_p.Ile194Thr | -                  | embB_p.Met306Val | gyrA_p.Asp94Ala                     | rrs_r.1401a>g |
| <b>R9157</b>  | rpoB_p.Ser450Leu                      | fabG1_c.-15C>T,<br>katG_p.Ser315Thr | pncA_p.Cys14Arg    | embB_p.Met306Ile | gyrA_p.Asp94Asn                     | rrs_r.1401a>g |
| <b>R38779</b> | rpoB_p.Ser450Leu                      | fabG1_c.-15C>T                      | pncA_p.Tyr103*     | embB_p.Met306Ile | gyrA_p.Asp94Gly                     | -             |
| <b>R29391</b> | rpoB_p.Asp435Val                      | fabG1_c.-17G>T,<br>katG_p.Ser315Thr | pncA_c.517_518insG | embB_p.Met306Ile | gyrB_p.Asn499Asp                    | rrs_r.1401a>g |
| <b>R23538</b> | rpoB_p.Ser450Leu                      | katG_p.Ser315Thr                    | pncA_p.Asp8Asn     | embB_p.Met306Val | gyrA_p.Asp94Gly                     | rrs_r.1401a>g |
| <b>R5258</b>  | rpoB_p.Ser450Leu                      | fabG1_c.-15C>T,<br>katG_p.Ser315Thr | pncA_p.Cys14Arg    | embB_p.Met306Ile | gyrA_p.Asp94Gly                     | rrs_r.1401a>g |
| <b>R27406</b> | rpoB_p.Asp435Val                      | fabG1_c.-17G>T,<br>katG_p.Ser315Thr | pncA_c.517_518insG | embB_p.Met306Ile | gyrA_p.Asp94Gly                     | rrs_r.1401a>g |
| <b>R19077</b> | rpoB_p.Ser450Leu                      | katG_p.Ser315Thr                    | -                  | embB_p.Met306Ile | gyrA_p.Asp94Gly                     | rrs_r.1401a>g |
| <b>R10637</b> | rpoB_p.Ser450Leu                      | fabG1_c.-15C>T,<br>inhA_p.Ile194Thr | pncA_p.Ser164Pro   | embB_p.Met306Val | gyrA_p.Ala90Val                     | rrs_r.1401a>g |
| <b>R24418</b> | rpoB_p.Asp435Val                      | fabG1_c.-17G>T,<br>katG_p.Ser315Thr | pncA_c.517_518insG | embB_p.Met306Ile | gyrA_p.Ala90Val                     | rrs_r.1401a>g |
| <b>R11709</b> | rpoB_p.Asp435Val                      | fabG1_c.-17G>T,<br>katG_p.Ser315Thr | pncA_c.517_518insG | embB_p.Met306Ile | gyrA_p.Asp94Gly                     | rrs_r.1401a>g |
| <b>R36112</b> | rpoB_p.Asp435Val                      | fabG1_c.-17G>T,<br>katG_p.Ser315Thr | pncA_c.517_518insG | embB_p.Met306Ile | gyrA_p.Asp94Asn                     | rrs_r.1401a>g |
| <b>R32278</b> | rpoB_p.Asp435Val                      | fabG1_c.-17G>T,<br>katG_p.Ser315Thr | pncA_c.517_518insG | embB_p.Met306Ile | gyrA_p.Asp94Gly                     | rrs_r.1401a>g |
| <b>R3731</b>  | rpoB_p.Asp435Val                      | fabG1_c.-17G>T,<br>katG_p.Ser315Thr | pncA_c.517_518insG | embB_p.Met306Ile | gyrA_p.Asp94Asn                     | rrs_r.1401a>g |
| <b>R4704</b>  | rpoB_p.Ser450Leu                      | fabG1_c.-15C>T,<br>katG_p.Ser315Thr | pncA_p.Cys14Arg    | embB_p.Met306Ile | gyrA_p.Ala90Val                     | rrs_r.1401a>g |
| <b>R5252</b>  | rpoB_p.Ser450Leu                      | fabG1_c.-15C>T,<br>ahpC_c.-48G>A    | pncA_p.Tyr103*     | embB_p.Asp354Ala | gyrA_p.Asp94Gly                     | rrs_r.1401a>g |
| <b>R12533</b> | rpoB_p.Ser450Leu,<br>rpoC_p.Phe452Ser | ahpC_c.-48G>A,<br>katG_p.Ser315Thr  | pncA_p.Val139Met   | embB_p.Met306Val | gyrB_p.Asp461His                    | rrs_r.1401a>g |

|               |                  |                                     |                    |                                       |                  |               |
|---------------|------------------|-------------------------------------|--------------------|---------------------------------------|------------------|---------------|
| <b>R18143</b> | rpoB_p.Ser450Leu | katG_p.Ser315Thr                    | pncA_p.Met175Val   | embB_p.Met306Val                      | gyrA_p.Ser91Pro  | -             |
| <b>R26831</b> | rpoB_p.Ser450Leu | fabG1_c.-15C>T,<br>katG_p.Ser315Thr | pncA_p.Cys14Arg    | embB_p.Met306Ile                      | gyrA_p.Asp94Gly  | rrs_r.1401a>g |
| <b>R24412</b> | rpoB_p.Ser450Leu | fabG1_c.-15C>T,<br>katG_p.Ser315Thr | pncA_p.Cys14Arg    | embB_p.Met306Ile                      | gyrA_p.Ala90Val  | rrs_r.1401a>g |
| <b>R22901</b> | rpoB_p.Ser450Leu | fabG1_c.-15C>T,<br>inhA_p.Ile194Thr | -                  | embB_p.Met306Val                      | gyrA_p.Asp94Ala  | rrs_r.1401a>g |
| <b>R16000</b> | rpoB_p.Ser450Leu | fabG1_c.-15C>T,<br>katG_p.Ser315Thr | pncA_p.Cys14Arg    | embB_p.Met306Ile                      | gyrA_p.Ala90Val  | rrs_r.1401a>g |
| <b>R3974</b>  | rpoB_p.Ser450Leu | fabG1_c.-15C>T,<br>inhA_p.Ile194Thr | -                  | embB_p.Met306Val                      | gyrA_p.Asp94Ala  | rrs_r.1401a>g |
| <b>R29794</b> | rpoB_p.Asp435Val | fabG1_c.-17G>T,<br>katG_p.Ser315Thr | pncA_c.517_518insG | embB_p.Met306Ile                      | gyrA_p.Asp94Gly  | rrs_r.1401a>g |
| <b>X85</b>    | rpoB_p.Ser450Leu | katG_p.Ser315Thr                    | pncA_p.Cys14Arg    | embB_p.Met306Ile,<br>embB_p.Gln497Lys | gyrA_p.Ala90Val  | rrs_r.1401a>g |
| <b>R21236</b> | rpoB_p.Asp435Val | fabG1_c.-17G>T,<br>katG_p.Ser315Thr | pncA_c.517_518insG | embB_p.Met306Ile                      | gyrA_p.Asp94Asn  | rrs_r.1401a>g |
| <b>R28751</b> | rpoB_p.Asp435Val | fabG1_c.-17G>T,<br>katG_p.Ser315Thr | pncA_c.517_518insG | embB_p.Met306Ile                      | gyrA_p.Asp94Gly  | rrs_r.1401a>g |
| <b>R21413</b> | rpoB_p.Ser450Leu | katG_p.Ser315Thr                    | pncA_p.Asp8Asn     | embB_p.Met306Val                      | gyrA_p.Asp94Gly  | rrs_r.1401a>g |
| <b>R36725</b> | rpoB_p.Asp435Val | fabG1_c.-17G>T,<br>katG_p.Ser315Thr | pncA_c.517_518insG | embB_p.Met306Ile                      | gyrA_p.Asp94Gly  | rrs_r.1401a>g |
| <b>R32070</b> | rpoB_p.Ser450Leu | fabG1_c.-15C>T,<br>katG_p.Ser315Thr | pncA_p.Cys14Arg    | embB_p.Met306Ile                      | gyrA_p.Asp94Gly  | rrs_r.1401a>g |
| <b>R19290</b> | rpoB_p.Asp435Val | fabG1_c.-17G>T,<br>katG_p.Ser315Thr | pncA_c.517_518insG | embB_p.Met306Ile                      | gyrA_p.Asp94Gly  | rrs_r.1401a>g |
| <b>R20863</b> | rpoB_p.Ser450Leu | fabG1_c.-15C>T,<br>inhA_p.Ile194Thr | -                  | embB_p.Met306Val                      | gyrA_p.Asp94Ala  | rrs_r.1401a>g |
| <b>R17970</b> | rpoB_p.Ser450Leu | fabG1_c.-15C>T,<br>katG_p.Ser315Thr | pncA_p.Cys14Arg    | embB_p.Met306Ile                      | gyrA_p.Asp94Tyr  | rrs_r.1401a>g |
| <b>R36765</b> | rpoB_p.Asp435Val | fabG1_c.-17G>T,<br>katG_p.Ser315Thr | pncA_c.517_518insG | embB_p.Met306Ile                      | gyrB_p.Glu501Asp | rrs_r.1401a>g |
| <b>R38960</b> | rpoB_p.Ser450Leu | ahpC_c.-48G>A,<br>katG_p.Ser315Thr  | pncA_p.Val139Met   | embB_p.Met306Val                      | gyrA_p.Ser91Pro  | rrs_r.1401a>g |
| <b>R2850</b>  | rpoB_p.Asp435Val | fabG1_c.-17G>T,<br>katG_p.Ser315Thr | pncA_c.517_518insG | embB_p.Met306Ile                      | gyrA_p.Gly88Cys  | rrs_r.1401a>g |
| <b>R19790</b> | rpoB_p.Asp435Val | fabG1_c.-17G>T,<br>katG_p.Ser315Thr | pncA_c.517_518insG | embB_p.Met306Ile                      | gyrA_p.Ser91Pro  | rrs_r.1401a>g |
| <b>R29690</b> | rpoB_p.Ser450Leu | katG_p.Ser315Thr                    | pncA_p.Asp8Asn     | embB_p.Met306Val                      | gyrA_p.Asp94Gly  | rrs_r.1401a>g |

|               |                  |                                     |                    |                  |                                     |               |
|---------------|------------------|-------------------------------------|--------------------|------------------|-------------------------------------|---------------|
| <b>R13449</b> | rpoB_p.Asp435Val | fabG1_c.-17G>T,<br>katG_p.Ser315Thr | pncA_c.517_518insG | embB_p.Met306Ile | gyrA_p.Asp94Gly                     | rrs_r.1401a>g |
| <b>R4775</b>  | rpoB_p.Ser450Leu | fabG1_c.-15C>T,<br>katG_p.Ser315Thr | pncA_p.Cys14Arg    | embB_p.Met306Ile | gyrA_p.Asp94Gly                     | rrs_r.1401a>g |
| <b>R4817</b>  | rpoB_p.Asp435Val | fabG1_c.-17G>T,<br>katG_p.Ser315Thr | pncA_c.517_518insG | embB_p.Met306Ile | gyrA_p.Asp94Gly                     | rrs_r.1401a>g |
| <b>R36351</b> | rpoB_p.Asp435Val | fabG1_c.-17G>T,<br>katG_p.Ser315Thr | pncA_c.517_518insG | embB_p.Met306Ile | gyrB_p.Glu501Asp                    | rrs_r.1401a>g |
| <b>R30040</b> | rpoB_p.Ser450Leu | fabG1_c.-15C>T                      | pncA_p.Tyr103*     | embB_p.Met306Ile | gyrA_p.Asp94Gly                     | rrs_r.1401a>g |
| <b>R19631</b> | rpoB_p.Asp435Val | fabG1_c.-17G>T,<br>katG_p.Ser315Thr | pncA_c.517_518insG | embB_p.Met306Ile | gyrA_p.Ala90Val                     | rrs_r.1401a>g |
| <b>R11158</b> | rpoB_p.Asp435Val | fabG1_c.-17G>T,<br>katG_p.Ser315Thr | pncA_c.517_518insG | embB_p.Met306Ile | gyrA_p.Ala90Val                     | rrs_r.1401a>g |
| <b>R17597</b> | rpoB_p.Asp435Val | fabG1_c.-17G>T,<br>katG_p.Ser315Thr | pncA_c.517_518insG | embB_p.Met306Ile | gyrA_p.Asp94Asn                     | rrs_r.1401a>g |
| <b>R17009</b> | rpoB_p.Ser450Leu | fabG1_c.-15C>T,<br>katG_p.Ser315Thr | pncA_p.Cys14Arg    | embB_p.Met306Ile | gyrA_p.Gly88Cys                     | rrs_r.1401a>g |
| <b>R9362</b>  | rpoB_p.Ser450Leu | fabG1_c.-15C>T,<br>inhA_p.Ile194Thr | pncA_p.Ser164Pro   | embB_p.Met306Val | gyrA_p.Asp94Asn                     | rrs_r.1401a>g |
| <b>R20890</b> | rpoB_p.Asp435Val | fabG1_c.-17G>T,<br>katG_p.Ser315Thr | pncA_c.517_518insG | embB_p.Met306Ile | gyrA_p.Asp94Asn                     | rrs_r.1401a>g |
| <b>R11689</b> | rpoB_p.Ser450Leu | fabG1_c.-15C>T,<br>katG_p.Ser315Thr | pncA_p.Cys14Arg    | embB_p.Met306Ile | gyrA_p.Gly88Cys                     | rrs_r.1401a>g |
| <b>R15797</b> | rpoB_p.Ser450Leu | fabG1_c.-15C>T,<br>katG_p.Ser315Thr | pncA_p.Cys14Arg    | embB_p.Met306Ile | gyrA_p.Asp94Gly                     | rrs_r.1401a>g |
| <b>R5954</b>  | rpoB_p.Ser450Leu | fabG1_c.-15C>T,<br>katG_p.Ser315Thr | pncA_p.Cys14Arg    | embB_p.Met306Ile | gyrA_p.Asp94Gly                     | rrs_r.1401a>g |
| <b>R27917</b> | rpoB_p.Ser450Leu | fabG1_c.-15C>T,<br>katG_p.Ser315Thr | pncA_p.Cys14Arg    | embB_p.Met306Ile | gyrA_p.Asp94Gly                     | rrs_r.1401a>g |
| <b>R23874</b> | rpoB_p.Ser450Leu | fabG1_c.-15C>T,<br>inhA_p.Ile194Thr | -                  | embB_p.Met306Val | gyrA_p.Asp94Ala,<br>gyrA_p.Ala90Val | rrs_r.1401a>g |
| <b>R3833</b>  | rpoB_p.Ser450Leu | fabG1_c.-15C>T,<br>katG_p.Ser315Thr | pncA_p.Cys14Arg    | embB_p.Met306Ile | gyrA_p.Asp94Gly                     | rrs_r.1401a>g |
| <b>X66</b>    | rpoB_p.Ser450Leu | fabG1_c.-15C>T                      | -                  | embB_p.Met306Val | gyrB_p.Arg446Cys                    | rrs_r.1401a>g |
| <b>R9950</b>  | rpoB_p.Ser450Leu | fabG1_c.-15C>T,<br>inhA_p.Ile194Thr | -                  | embB_p.Met306Val | gyrA_p.Asp94Ala                     | rrs_r.1401a>g |
| <b>R2967</b>  | rpoB_p.Asp435Val | fabG1_c.-17G>T,<br>katG_p.Ser315Thr | pncA_c.517_518insG | embB_p.Met306Ile | gyrA_p.Asp94Gly                     | rrs_r.1401a>g |
| <b>R38180</b> | rpoB_p.Ser450Leu | fabG1_c.-15C>T,<br>katG_p.Ser315Thr | pncA_p.Cys14Arg    | embB_p.Met306Ile | gyrA_p.Gly88Cys                     | rrs_r.1401a>g |

|               |                  |                                     |                     |                  |                 |               |
|---------------|------------------|-------------------------------------|---------------------|------------------|-----------------|---------------|
| <b>R21092</b> | rpoB_p.Asp435Val | fabG1_c.-17G>T,<br>katG_p.Ser315Thr | pncA_c.517_518insG  | embB_p.Met306Ile | gyrA_p.Ala90Val | rrs_r.1401a>g |
| <b>R5066</b>  | rpoB_p.Ser450Leu | fabG1_c.-15C>T                      | pncA_p.Tyr103*      | embB_p.Gly406Asp | gyrA_p.Asp94Gly | rrs_r.1401a>g |
| <b>X198</b>   | rpoB_p.Ser450Leu | fabG1_c.-15C>T,<br>inhA_p.Ile194Thr | -                   | embB_p.Met306Val | gyrA_p.Asp94Ala | rrs_r.1401a>g |
| <b>R18045</b> | rpoB_p.Ser450Leu | fabG1_c.-15C>T,<br>katG_p.Ser315Thr | pncA_p.Cys14Arg     | embB_p.Met306Ile | gyrA_p.Asp94Gly | rrs_r.1401a>g |
| <b>R33791</b> | rpoB_p.Ser450Leu | fabG1_c.-15C>T,<br>katG_p.Ser315Thr | pncA_p.Cys14Arg     | embB_p.Met306Ile | gyrA_p.Asp94Gly | rrs_r.1401a>g |
| <b>R38864</b> | rpoB_p.Asp435Val | fabG1_c.-17G>T,<br>katG_p.Ser315Thr | pncA_c.517_518insG  | embB_p.Met306Ile | gyrA_p.Asp94Asn | rrs_r.1401a>g |
| <b>R13332</b> | rpoB_p.Ser450Leu | fabG1_c.-15C>T,<br>katG_p.Ser315Thr | pncA_p.Cys14Arg     | embB_p.Met306Ile | gyrA_p.Asp94Tyr | rrs_r.1401a>g |
| <b>R11502</b> | rpoB_p.Ser450Leu | fabG1_c.-15C>T,<br>katG_p.Ser315Thr | pncA_p.Cys14Arg     | embB_p.Met306Ile | gyrA_p.Gly88Cys | rrs_r.1401a>g |
| <b>R33316</b> | rpoB_p.Ser450Leu | fabG1_c.-15C>T,<br>katG_p.Ser315Thr | pncA_p.Ser164Pro    | embB_p.Met306Ile | gyrA_p.Asp94Ala | rrs_r.1401a>g |
| <b>R33506</b> | rpoB_p.Ser450Leu | fabG1_c.-15C>T                      | pncA_c.135_136insTG | embB_p.Gly406Asp | gyrA_p.Asp94Gly | rrs_r.1401a>g |
| <b>R5490</b>  | rpoB_p.Asp435Val | fabG1_c.-17G>T,<br>katG_p.Ser315Thr | pncA_c.517_518insG  | embB_p.Met306Ile | gyrA_p.Asp94Gly | rrs_r.1401a>g |
| <b>R32275</b> | rpoB_p.Ser450Leu | fabG1_c.-15C>T,<br>katG_p.Ser315Thr | pncA_p.Cys14Arg     | embB_p.Met306Ile | gyrA_p.Asp94Gly | rrs_r.1401a>g |
| <b>R33997</b> | rpoB_p.Ser450Leu | fabG1_c.-15C>T,<br>katG_p.Ser315Thr | pncA_p.Cys14Arg     | embB_p.Met306Ile | gyrA_p.Asp94Ala | rrs_r.1401a>g |
| <b>R18285</b> | rpoB_p.Ser450Leu | fabG1_c.-15C>T,<br>katG_p.Ser315Thr | pncA_p.Cys14Arg     | embB_p.Met306Ile | gyrA_p.Asp94Gly | rrs_r.1401a>g |
| <b>R16462</b> | rpoB_p.Ser450Leu | fabG1_c.-15C>T,<br>inhA_p.Ile194Thr | -                   | embB_p.Met306Val | gyrA_p.Asp94Ala | rrs_r.1401a>g |
| <b>R10212</b> | rpoB_p.Asp435Val | fabG1_c.-17G>T,<br>katG_p.Ser315Thr | pncA_c.517_518insG  | embB_p.Met306Ile | gyrA_p.Asp94Gly | rrs_r.1401a>g |
| <b>R29538</b> | rpoB_p.Asp435Val | fabG1_c.-17G>T,<br>katG_p.Ser315Thr | pncA_c.517_518insG  | embB_p.Met306Ile | gyrA_p.Asp94Gly | rrs_r.1401a>g |
| <b>R8081</b>  | rpoB_p.Asp435Val | fabG1_c.-17G>T,<br>katG_p.Ser315Thr | pncA_c.517_518insG  | embB_p.Met306Ile | gyrA_p.Gly88Cys | rrs_r.1401a>g |
| <b>R4577</b>  | rpoB_p.Asp435Val | fabG1_c.-17G>T,<br>katG_p.Ser315Thr | pncA_c.517_518insG  | embB_p.Met306Ile | gyrA_p.Asp94Gly | rrs_r.1401a>g |
| <b>R15871</b> | rpoB_p.Ser450Leu | fabG1_c.-15C>T                      | -                   | -                | gyrA_p.Asp94Gly | rrs_r.1401a>g |
| <b>R27659</b> | rpoB_p.Asp435Val | fabG1_c.-17G>T,<br>katG_p.Ser315Thr | pncA_c.517_518insG  | embB_p.Met306Ile | gyrA_p.Ala90Val | rrs_r.1401a>g |

|               |                                       |                                     |                    |                  |                 |               |
|---------------|---------------------------------------|-------------------------------------|--------------------|------------------|-----------------|---------------|
| <b>R36851</b> | rpoB_p.Ser450Leu                      | fabG1_c.-15C>T                      | pncA_p.Tyr103*     | embB_p.Met306Val | gyrA_p.Asp94Asn | rrs_r.1401a>g |
| <b>R10877</b> | rpoB_p.Ser450Leu                      | fabG1_c.-15C>T,<br>katG_p.Ser315Thr | pncA_p.Cys14Arg    | embB_p.Met306Ile | gyrA_p.Asp94Ala | rrs_r.1401a>g |
| <b>R4312</b>  | rpoB_p.Ser450Leu                      | fabG1_c.-15C>T,<br>katG_p.Ser315Thr | pncA_p.Cys14Arg    | embB_p.Met306Ile | gyrA_p.Asp94Gly | rrs_r.1401a>g |
| <b>R17303</b> | rpoB_p.Asp435Val                      | fabG1_c.-17G>T,<br>katG_p.Ser315Thr | pncA_c.517_518insG | embB_p.Met306Ile | gyrA_p.Asp94Asn | rrs_r.1401a>g |
| <b>R3960</b>  | rpoB_p.Ser450Leu                      | fabG1_c.-15C>T,<br>katG_p.Ser315Thr | pncA_p.Cys14Arg    | embB_p.Met306Ile | gyrA_p.Asp94Gly | rrs_r.1401a>g |
| <b>R24216</b> | rpoB_p.Ser450Leu                      | fabG1_c.-15C>T,<br>inhA_p.Ile194Thr | -                  | embB_p.Met306Val | gyrA_p.Asp94Ala | rrs_r.1401a>g |
| <b>R4825</b>  | rpoB_p.Ser450Leu                      | katG_p.Ser315Thr                    | pncA_p.Asp8Asn     | embB_p.Met306Val | gyrA_p.Asp94Gly | rrs_r.1401a>g |
| <b>R27605</b> | rpoB_p.Asp435Val                      | fabG1_c.-17G>T,<br>katG_p.Ser315Thr | pncA_c.517_518insG | embB_p.Met306Ile | gyrA_p.Asp94Asn | rrs_r.1401a>g |
| <b>R33925</b> | rpoB_p.Ser450Leu                      | fabG1_c.-15C>T,<br>katG_p.Ser315Thr | pncA_p.Cys14Arg    | embB_p.Met306Ile | gyrA_p.Asp94Gly | rrs_r.1401a>g |
| <b>R20825</b> | rpoB_p.Asp435Val                      | fabG1_c.-17G>T,<br>katG_p.Ser315Thr | pncA_c.517_518insG | embB_p.Met306Ile | gyrA_p.Asp94Asn | rrs_r.1401a>g |
| <b>R27920</b> | rpoB_p.His445Arg,<br>rpoB_p.Ser450Leu | fabG1_c.-15C>T,<br>inhA_p.Ile194Thr | pncA_p.Asp8Asn     | embB_p.Met306Val | gyrA_p.Asp94Gly | rrs_r.1401a>g |
| <b>R4488</b>  | rpoB_p.Asp435Val                      | fabG1_c.-17G>T,<br>katG_p.Ser315Thr | pncA_c.517_518insG | embB_p.Met306Ile | gyrA_p.Asp94Gly | rrs_r.1401a>g |
| <b>R11380</b> | rpoB_p.Asp435Val                      | fabG1_c.-17G>T,<br>katG_p.Ser315Thr | pncA_c.517_518insG | embB_p.Met306Ile | gyrA_p.Asp94Ala | rrs_r.1401a>g |
| <b>R3093</b>  | rpoB_p.Ser450Leu                      | fabG1_c.-15C>T,<br>katG_p.Ser315Thr | pncA_p.Cys14Arg    | embB_p.Met306Ile | gyrA_p.Gly88Cys | rrs_r.1401a>g |
| <b>R18647</b> | rpoB_p.Asp435Val                      | fabG1_c.-17G>T,<br>katG_p.Ser315Thr | pncA_c.517_518insG | embB_p.Met306Ile | gyrA_p.Asp94Gly | rrs_r.1401a>g |
| <b>R34532</b> | rpoB_p.Ser450Leu                      | fabG1_c.-15C>T,<br>katG_p.Ser315Thr | pncA_p.Cys14Arg    | embB_p.Met306Ile | gyrA_p.Ala90Val | rrs_r.1401a>g |
| <b>R35862</b> | rpoB_p.Asp435Val                      | fabG1_c.-17G>T,<br>katG_p.Ser315Thr | pncA_c.517_518insG | embB_p.Met306Ile | gyrA_p.Asp94Gly | rrs_r.1401a>g |
| <b>R15416</b> | rpoB_p.Ser450Leu                      | fabG1_c.-15C>T,<br>katG_p.Ser315Thr | pncA_p.Cys14Arg    | embB_p.Met306Ile | gyrA_p.Asp89Asn | rrs_r.1401a>g |
| <b>X38</b>    | rpoB_p.Ser450Leu                      | fabG1_c.-15C>T,<br>katG_p.Ser315Thr | pncA_p.Cys14Arg    | embB_p.Met306Ile | gyrA_p.Asp94Gly | rrs_r.1401a>g |
| <b>R35206</b> | rpoB_p.His445Asn                      | katG_p.Ser315Thr                    | -                  | embB_p.Met306Val | gyrA_p.Asp94Gly | rrs_r.1401a>g |
| <b>R3269</b>  | rpoB_p.Ser450Leu                      | fabG1_c.-15C>T,<br>katG_p.Ser315Thr | pncA_p.Cys14Arg    | embB_p.Met306Ile | gyrA_p.Asp94Asn | rrs_r.1401a>g |

|               |                  |                                     |                    |                  |                  |               |
|---------------|------------------|-------------------------------------|--------------------|------------------|------------------|---------------|
| <b>R6254</b>  | rpoB_p.Ser450Leu | fabG1_c.-15C>T,<br>katG_p.Ser315Thr | pncA_p.Cys14Arg    | embB_p.Met306Ile | gyrA_p.Asp94Gly  | rrs_r.1401a>g |
| <b>R38593</b> | rpoB_p.Asp435Val | fabG1_c.-17G>T,<br>katG_p.Ser315Thr | pncA_c.517_518insG | embB_p.Met306Ile | gyrA_p.Asp94Ala  | rrs_r.1401a>g |
| <b>R3415</b>  | rpoB_p.Asp435Val | fabG1_c.-17G>T,<br>katG_p.Ser315Thr | pncA_c.517_518insG | embB_p.Met306Ile | gyrA_p.Asp94Gly  | rrs_r.1401a>g |
| <b>R27725</b> | rpoB_p.Ser450Leu | fabG1_c.-15C>T,<br>katG_p.Ser315Thr | pncA_p.Cys14Arg    | embB_p.Met306Ile | gyrA_p.Asp94Gly  | rrs_r.1401a>g |
| <b>R32158</b> | rpoB_p.Ser450Leu | fabG1_c.-15C>T,<br>inhA_p.Ile194Thr | -                  | embB_p.Met306Val | gyrA_p.Asp94Ala  | rrs_r.1401a>g |
| <b>R19442</b> | rpoB_p.Asp435Val | fabG1_c.-17G>T,<br>katG_p.Ser315Thr | pncA_c.517_518insG | embB_p.Met306Ile | gyrA_p.Asp94Gly  | rrs_r.1401a>g |
| <b>R17246</b> | rpoB_p.Asp435Val | fabG1_c.-17G>T,<br>katG_p.Ser315Thr | pncA_c.517_518insG | embB_p.Met306Ile | gyrA_p.Ser91Pro  | rrs_r.1401a>g |
| <b>R37936</b> | rpoB_p.Ser450Leu | ahpC_c.-48G>A,<br>katG_p.Ser315Thr  | pncA_p.Val139Met   | embB_p.Met306Val | gyrA_p.Ala90Val  | rrs_r.1401a>g |
| <b>R5354</b>  | rpoB_p.Ser450Leu | fabG1_c.-15C>T,<br>katG_p.Ser315Thr | pncA_p.Cys14Arg    | embB_p.Met306Ile | gyrA_p.Asp94Gly  | rrs_r.1401a>g |
| <b>R33511</b> | rpoB_p.Ser450Leu | fabG1_c.-15C>T,<br>katG_p.Ser315Thr | pncA_p.Cys14Arg    | embB_p.Met306Ile | gyrA_p.Asp94Gly  | rrs_r.1401a>g |
| <b>R27658</b> | rpoB_p.Asp435Val | fabG1_c.-17G>T,<br>katG_p.Ser315Thr | pncA_c.517_518insG | embB_p.Met306Ile | gyrA_p.Ala90Val  | rrs_r.1401a>g |
| <b>R29503</b> | rpoB_p.Ser450Leu | fabG1_c.-15C>T,<br>inhA_p.Ile194Thr | pncA_p.Asp8Asn     | embB_p.Met306Val | gyrB_p.Glu501Asp | rrs_r.1401a>g |
| <b>R18095</b> | rpoB_p.Ser450Leu | fabG1_c.-15C>T,<br>inhA_p.Ile194Thr | pncA_p.Asp8Asn     | embB_p.Met306Val | gyrA_p.Asp94Gly  | rrs_r.1401a>g |
| <b>R37955</b> | rpoB_p.Asp435Val | fabG1_c.-17G>T,<br>katG_p.Ser315Thr | pncA_c.517_518insG | embB_p.Met306Ile | gyrA_p.Asp94Asn  | rrs_r.1401a>g |
| <b>R22895</b> | rpoB_p.Asp435Val | fabG1_c.-17G>T,<br>katG_p.Ser315Thr | pncA_c.517_518insG | embB_p.Met306Ile | gyrA_p.Asp94Asn  | rrs_r.1401a>g |
| <b>R31314</b> | rpoB_p.Asp435Val | fabG1_c.-17G>T,<br>katG_p.Ser315Thr | pncA_c.517_518insG | embB_p.Met306Ile | gyrA_p.Asp94Gly  | rrs_r.1401a>g |
| <b>R30466</b> | rpoB_p.Asp435Val | fabG1_c.-17G>T,<br>katG_p.Ser315Thr | pncA_c.517_518insG | embB_p.Met306Ile | gyrA_p.Asp94Gly  | rrs_r.1401a>g |
| <b>X3</b>     | rpoB_p.Ser450Leu | fabG1_c.-15C>T,<br>katG_p.Ser315Thr | pncA_p.Cys14Arg    | embB_p.Met306Ile | gyrA_p.Asp94Gly  | rrs_r.1401a>g |
| <b>X186</b>   | rpoB_p.Asp435Val | fabG1_c.-17G>T,<br>katG_p.Ser315Thr | pncA_c.517_518insG | embB_p.Met306Ile | gyrA_p.Asp94Ala  | rrs_r.1401a>g |
| <b>R2841</b>  | rpoB_p.Ser450Leu | fabG1_c.-15C>T,<br>katG_p.Ser315Thr | pncA_p.Cys14Arg    | embB_p.Met306Ile | gyrA_p.Asp94Ala  | rrs_r.1401a>g |



|               |                                       |                                     |                    |                  |                 |               |
|---------------|---------------------------------------|-------------------------------------|--------------------|------------------|-----------------|---------------|
| <b>R15141</b> | rpoB_p.Ser450Leu                      | katG_p.Ser315Thr                    | pncA_p.Asp8Asn     | embB_p.Met306Val | gyrA_p.Asp94Gly | rrs_r.1401a>g |
| <b>R13587</b> | rpoB_p.Ser450Leu,<br>rpoC_p.Leu527Val | fabG1_c.-15C>T,<br>inhA_p.Ile194Thr | -                  | embB_p.Met306Val | gyrA_p.Ala90Val | rrs_r.1401a>g |
| <b>R32055</b> | rpoB_p.Ser450Leu                      | fabG1_c.-15C>T,<br>katG_p.Ser315Thr | pncA_p.Cys14Arg    | embB_p.Met306Ile | gyrA_p.Asp94Tyr | rrs_r.1401a>g |
| <b>R24188</b> | rpoB_p.Ser450Leu                      | fabG1_c.-15C>T,<br>inhA_p.Ile194Thr | pncA_p.Asp8Asn     | embB_p.Met306Val | gyrA_p.Asp94Asn | rrs_r.1401a>g |
| <b>R19246</b> | rpoB_p.Asp435Val                      | fabG1_c.-17G>T,<br>katG_p.Ser315Thr | pncA_c.517_518insG | embB_p.Met306Ile | gyrA_p.Asp94Asn | rrs_r.1401a>g |

<sup>a</sup> INH = isoniazid, RIF = rifampicin, EMB = ethambutol, PZA = pyrazinamide, SLIDs = second line injectable drugs, FQs = fluoroquinolones, - = no mutati

**Table S3** The number of clusters after merging on common ancestor using different SNP cutoffs

| <b>SNP cutoff</b>                                    | 5  | 8  | 10 | 12 | 15 |
|------------------------------------------------------|----|----|----|----|----|
| <b>Clusters after merging on common ancestor (n)</b> | 12 | 11 | 12 | 10 | 10 |

## Supplementary figures

**Figure S1** Distribution of cluster sizes with 7 small clusters (2-4 isolates), 1 medium cluster (19 isolates), 3 large clusters (66, 70, 72 isolates) and 1 very large cluster (150 isolates).

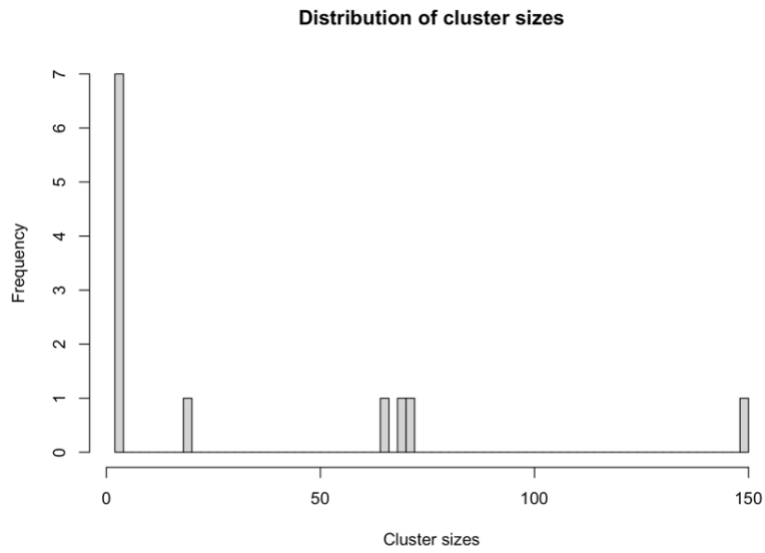

**Figure S2** Phylogenetic tree annotated with lineage information (inner circle) and transmission cluster sizes (outer circle). All large clusters are part of lineage 2.2.1 and 2.2.2.

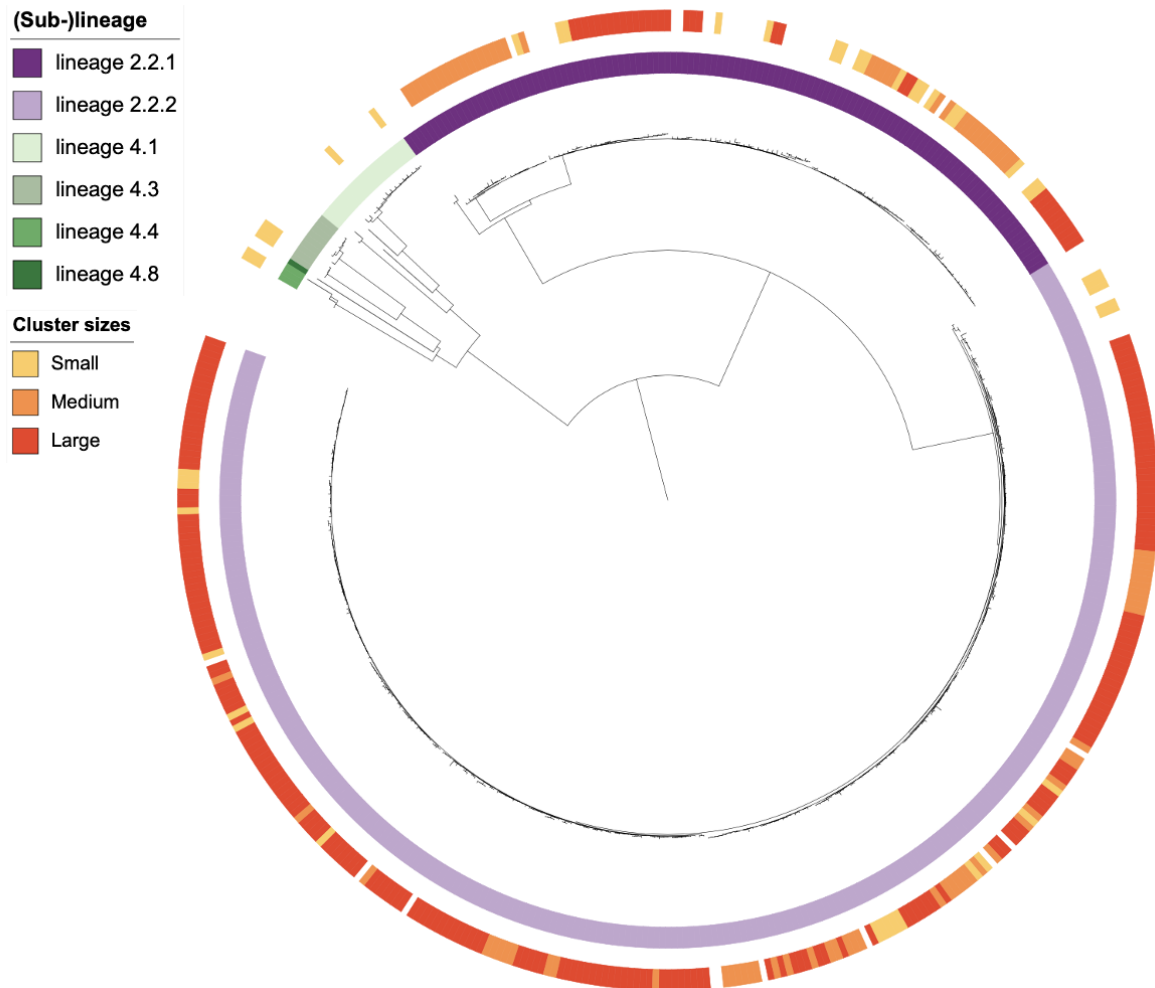

**Figure S3a** Distribution of gender (inner circle) and cluster sizes after inclusion of INH + RIF + EMB + PZA + FQs + SLIDs resistance conferring mutations (outer circle) across the phylogenetic tree of individual XDR-Mtb isolates collected from 461 patients in the Western Cape Province of South Africa, 2006-2017

**Fig S3b** Distribution of age (inner circle) and cluster sizes after inclusion of INH + RIF + EMB + PZA + FQs + SLIDs resistance conferring mutations (outer circle) across the phylogenetic tree of individual XDR-Mtb isolates collected from 461 patients in the Western Cape Province of South Africa, 2006-2017

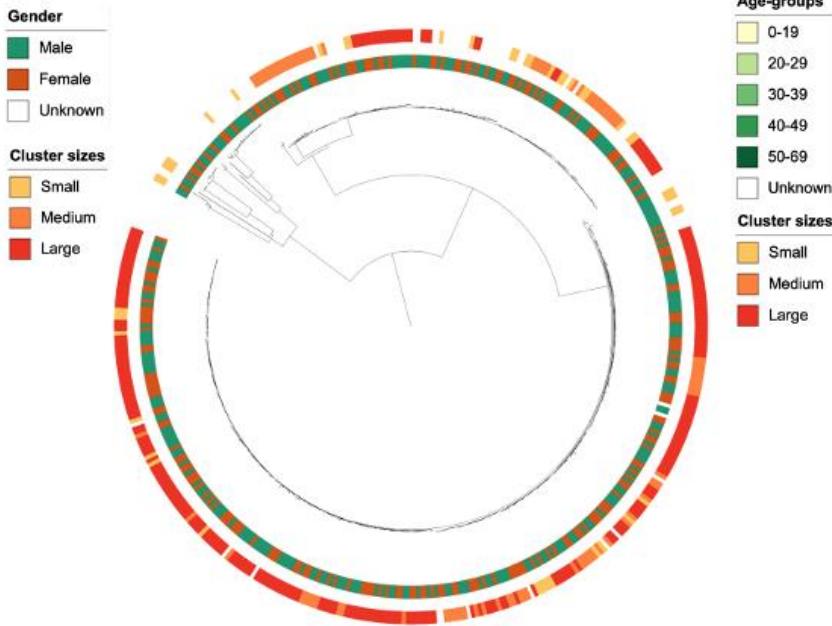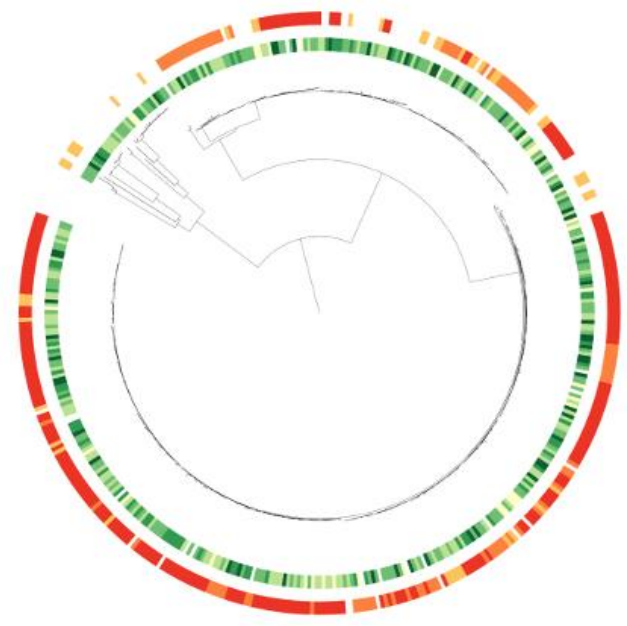

**Fig S3c** Distribution of district (urban vs. rural) (inner circle) and cluster sizes after inclusion of INH + RIF + EMB + PZA + SLIDs + FQs resistance conferring mutations (outer circle) across the phylogenetic tree of individual XDR-Mtb isolates collected from 461 patients in the Western Cape Province of South Africa, 2006-2017

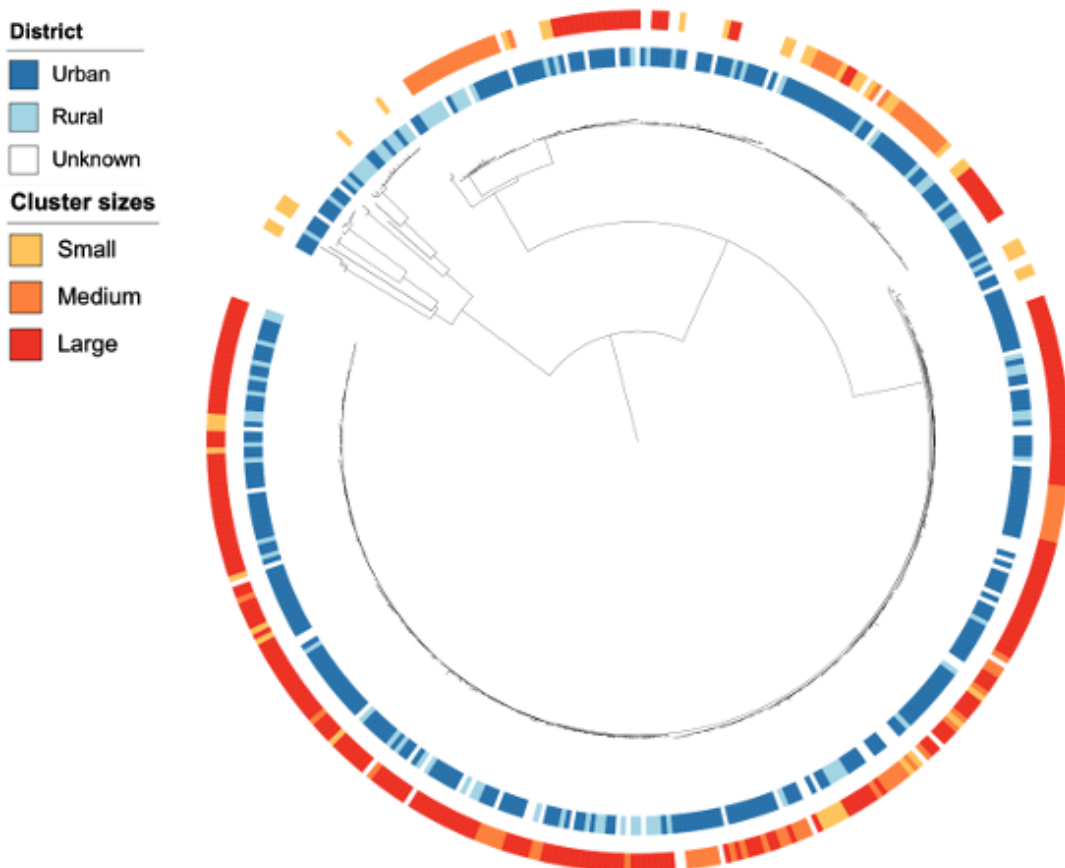

Supplement: mgen-8-0815-s001.pdf [file mgen-8-0815-s001.pdf]
